# Supplementary material for: A first attempt investigation on crystallization screening and crystal quality of lysozyme under different simulated gravities in a large-gradient magnetic field
Source: Royal Society of Chemistry journal article supplement (doi:10.1039/c9ce00730j), 2019-01-01
Supplement: c9ce00730j1.pdf [file c9ce00730j1.pdf]

## Supporting information

Supplementary Tables: X-ray diffraction data statistics of all the lysozyme crystals obtained under different simulated-gravities in a large gradient magnetic field and outside the magnet which can be processed by HKL-2000 software package. The data in each table including the result of three times repeated experiment.

**Table S1** X-ray diffraction data statistics of lysozyme crystals obtained under simulated  $\mu\text{g}$  condition in the superconducting magnet with lysozyme concentration 20 mg/ml.

|                                                 | Diffraction data statistics of lysozyme crystals |                                |                                |                                |                                |
|-------------------------------------------------|--------------------------------------------------|--------------------------------|--------------------------------|--------------------------------|--------------------------------|
|                                                 | Crystal 1                                        | Crystal 2                      | Crystal 3                      | Crystal 4                      | Crystal 5                      |
| Resolution range                                | 50-2.18                                          | 50-2.19                        | 50-2.19                        | 50-2.23                        | 50-2.26                        |
| (Å)                                             | (2.22-2.18)                                      | (2.23-2.19)                    | (2.23-2.19)                    | (2.27-2.23)                    | (2.30-2.26)                    |
| Mosaicity (°)                                   | 0.38                                             | 0.33                           | 0.38                           | 0.34                           | 0.29                           |
| $\langle I \rangle / \langle \sigma(I) \rangle$ | 15.32 (2.42)                                     | 13.38 (2.59)                   | 14.45 (2.56)                   | 14.22 (3.87)                   | 8.82 (2.13)                    |
| Space group                                     | $P4_32_12$                                       | $P4_32_12$                     | $P4_32_12$                     | $P4_32_12$                     | $P4_32_12$                     |
| Cell dimension                                  | $a = 78.88$                                      | $a = 78.25$                    | $a = 78.53$                    | $a = 78.64$                    | $a = 78.64$                    |
| $a, b, c$ (Å)                                   | $b = 78.88$                                      | $b = 78.25$                    | $b = 78.53$                    | $b = 78.64$                    | $b = 78.64$                    |
|                                                 | $c = 38.17$                                      | $c = 38.54$                    | $c = 38.35$                    | $c = 38.42$                    | $c = 38.16$                    |
| $\alpha, \beta, \gamma$ (°)                     | $\alpha = \beta = \gamma = 90$                   | $\alpha = \beta = \gamma = 90$ | $\alpha = \beta = \gamma = 90$ | $\alpha = \beta = \gamma = 90$ | $\alpha = \beta = \gamma = 90$ |
| Exposure time                                   |                                                  |                                | 5                              |                                |                                |
| (min)                                           |                                                  |                                |                                |                                |                                |
| Oscillation angle                               |                                                  |                                | 1                              |                                |                                |
| (°)                                             |                                                  |                                |                                |                                |                                |
| Detector distance                               |                                                  |                                | 200                            |                                |                                |
| (mm)                                            |                                                  |                                |                                |                                |                                |
| Wavelength (Å)                                  |                                                  |                                | 1.54178                        |                                |                                |

Values in parentheses are for the highest resolution shell.

| Diffraction data statistics of lysozyme crystals |                                |                                |                                |                                |                                |
|--------------------------------------------------|--------------------------------|--------------------------------|--------------------------------|--------------------------------|--------------------------------|
|                                                  | Crystal 6                      | Crystal 7                      | Crystal 8                      | Crystal 9                      | Crystal 10                     |
| Resolution range                                 | 50-2.32                        | 50-2.40                        | 50-2.41                        | 50-2.45                        | 50-2.53                        |
| (Å)                                              | (2.36-2.32)                    | (2.44-2.40)                    | (2.45-2.41)                    | (2.49-2.45)                    | (2.57-2.53)                    |
| Mosaicity (°)                                    | 0.35                           | 0.53                           | 0.55                           | 0.38                           | 0.58                           |
| $\langle I \rangle / \langle \sigma(I) \rangle$  | 9.47 (2.44)                    | 10.98 (2.40)                   | 9.25 (2.25)                    | 9.08 (2.57)                    | 9.43 (2.49)                    |
| Space group                                      | $P4_32_12$                     | $P4_32_12$                     | $P4_32_12$                     | $P4_32_12$                     | $P4_32_12$                     |
| Cell dimension                                   | $a = 78.64$                    | $a = 78.66$                    | $a = 78.89$                    | $a = 78.67$                    | $a = 76.89$                    |
| $a, b, c$ (Å)                                    | $b = 78.64$                    | $b = 78.66$                    | $b = 78.89$                    | $b = 78.67$                    | $b = 76.89$                    |
|                                                  | $c = 38.01$                    | $c = 38.28$                    | $c = 38.07$                    | $c = 38.09$                    | $c = 36.09$                    |
| $\alpha, \beta, \gamma$ (°)                      | $\alpha = \beta = \gamma = 90$ |
| Exposure time<br>(min)                           |                                |                                | 5                              |                                |                                |
| Oscillation angle<br>(°)                         |                                |                                | 1                              |                                |                                |
| Detector distance<br>(mm)                        | 200                            | 200                            | 190                            | 200                            | 200                            |
| Wavelength (Å)                                   |                                |                                | 1.54178                        |                                |                                |

Values in parentheses are for the highest resolution shell.

| Diffraction data statistics of lysozyme crystals |             |             |             |             |             |
|--------------------------------------------------|-------------|-------------|-------------|-------------|-------------|
|                                                  | Crystal 11  | Crystal 12  | Crystal 13  | Crystal 14  | Crystal 15  |
| Resolution range                                 | 50-2.53     | 50-2.59     | 50-2.61     | 50-2.69     | 50-2.78     |
| (Å)                                              | (2.57-2.53) | (2.63-2.59) | (2.66-2.61) | (2.74-2.69) | (2.83-2.78) |
| Mosaicity (°)                                    | 1.06        | 0.28        | 1.14        | 0.25        | 0.31        |
| $\langle I \rangle / \langle \sigma(I) \rangle$  | 8.07 (4.08) | 7.60 (3.40) | 9.26 (2.62) | 6.93 (2.26) | 7.09 (2.03) |
| Space group                                      | $P4_32_12$  | $P4_32_12$  | $P4_32_12$  | $P4_32_12$  | $P4_32_12$  |
| Cell dimension                                   | $a = 78.51$ | $a = 78.61$ | $a = 78.74$ | $a = 78.27$ | $a = 78.67$ |
| $a, b, c$ (Å)                                    | $b = 78.51$ | $b = 78.61$ | $b = 78.74$ | $b = 78.27$ | $b = 78.67$ |

|                             | $c = 38.42$                    | $c = 38.36$                    | $c = 38.06$                    | $c = 37.35$                    | $c = 38.30$                    |
|-----------------------------|--------------------------------|--------------------------------|--------------------------------|--------------------------------|--------------------------------|
| $\alpha, \beta, \gamma$ (°) | $\alpha = \beta = \gamma = 90$ |
| Exposure time<br>(min)      |                                |                                | 5                              |                                |                                |
| Oscillation angle<br>(°)    |                                |                                | 1                              |                                |                                |
| Detector distance<br>(mm)   | 185                            | 200                            | 200                            | 185                            | 200                            |
| Wavelength (Å)              |                                |                                | 1.54178                        |                                |                                |

Values in parentheses are for the highest resolution shell.

|                                                 | Diffraction data statistics of lysozyme crystals |                                           |                                           |                                           |
|-------------------------------------------------|--------------------------------------------------|-------------------------------------------|-------------------------------------------|-------------------------------------------|
|                                                 | Crystal 16                                       | Crystal 17                                | Crystal 18                                | Crystal 19                                |
| Resolution range<br>(Å)                         | 50-2.79<br>(2.84-2.79)                           | 50-2.80<br>(2.85-2.80)                    | 50-2.80<br>(2.85-2.80)                    | 50-2.87<br>(2.92-2.87)                    |
| Mosaicity (°)                                   | 0.23                                             | 0.85                                      | 1.08                                      | 0.75                                      |
| $\langle I \rangle / \langle \sigma(I) \rangle$ | 6.82 (2.20)                                      | 10.04 (2.20)                              | 7.58 (3.15)                               | 8.05 (2.51)                               |
| Space group                                     | $P4_32_12$                                       | $P4_32_12$                                | $P4_32_12$                                | $P4_32_12$                                |
| Cell dimension<br>$a, b, c$ (Å)                 | $a = 78.77$<br>$b = 78.77$<br>$c = 38.87$        | $a = 78.49$<br>$b = 78.49$<br>$c = 38.27$ | $a = 78.05$<br>$b = 78.05$<br>$c = 38.16$ | $a = 78.76$<br>$b = 78.76$<br>$c = 38.14$ |
| $\alpha, \beta, \gamma$ (°)                     | $\alpha = \beta = \gamma = 90$                   | $\alpha = \beta = \gamma = 90$            | $\alpha = \beta = \gamma = 90$            | $\alpha = \beta = \gamma = 90$            |
| Exposure time<br>(min)                          |                                                  |                                           | 5                                         |                                           |
| Oscillation angle<br>(°)                        |                                                  |                                           | 1                                         |                                           |
| Detector distance<br>(mm)                       |                                                  |                                           | 200                                       |                                           |
| Wavelength (Å)                                  |                                                  |                                           | 1.54178                                   |                                           |

Values in parentheses are for the highest resolution shell.

**Table S2** X-ray diffraction data statistics of lysozyme crystals obtained under simulated 1g condition in the superconducting magnet with lysozyme concentration 20 mg/ml.

|                                                 | Diffraction data statistics of lysozyme crystals |                                |                                |                                |                                |
|-------------------------------------------------|--------------------------------------------------|--------------------------------|--------------------------------|--------------------------------|--------------------------------|
|                                                 | Crystal 1                                        | Crystal 2                      | Crystal 3                      | Crystal 4                      | Crystal 5                      |
| Resolution range                                | 50-2.19                                          | 50-2.25                        | 50-2.29                        | 50-2.33                        | 50-2.53                        |
| (Å)                                             | (2.23-2.19)                                      | (2.29-2.25)                    | (2.33-2.29)                    | (2.37-2.33)                    | (2.57-2.53)                    |
| Mosaicity (°)                                   | 0.64                                             | 0.91                           | 0.42                           | 0.50                           | 0.68                           |
| $\langle I \rangle / \langle \sigma(I) \rangle$ | 10.79 (2.80)                                     | 12.96 (2.31)                   | 9.92 (2.27)                    | 9.44 (2.31)                    | 9.73 (2.63)                    |
| Space group                                     | $P4_32_12$                                       | $P4_32_12$                     | $P4_32_12$                     | $P4_32_12$                     | $P4_32_12$                     |
| Cell dimension                                  | $a = 78.32$                                      | $a = 78.81$                    | $a = 78.23$                    | $a = 79.04$                    | $a = 78.51$                    |
| $a, b, c$ (Å)                                   | $b = 78.32$                                      | $b = 78.81$                    | $b = 78.23$                    | $b = 79.04$                    | $b = 78.51$                    |
|                                                 | $c = 37.74$                                      | $c = 37.94$                    | $c = 38.06$                    | $c = 37.99$                    | $c = 38.18$                    |
| $\alpha, \beta, \gamma$ (°)                     | $\alpha = \beta = \gamma = 90$                   | $\alpha = \beta = \gamma = 90$ | $\alpha = \beta = \gamma = 90$ | $\alpha = \beta = \gamma = 90$ | $\alpha = \beta = \gamma = 90$ |
| Exposure time                                   | 5                                                |                                |                                |                                |                                |
| (min)                                           |                                                  |                                |                                |                                |                                |
| Oscillation angle                               | 1                                                |                                |                                |                                |                                |
| (°)                                             |                                                  |                                |                                |                                |                                |
| Detector distance                               | 200                                              |                                |                                |                                |                                |
| (mm)                                            |                                                  |                                |                                |                                |                                |
| Wavelength (Å)                                  | 1.54178                                          |                                |                                |                                |                                |

Values in parentheses are for the highest resolution shell.

|                                                 | Diffraction data statistics of lysozyme crystals |              |             |              |             |
|-------------------------------------------------|--------------------------------------------------|--------------|-------------|--------------|-------------|
|                                                 | Crystal 6                                        | Crystal 7    | Crystal 8   | Crystal 9    | Crystal 10  |
| Resolution range                                | 50-2.63                                          | 50-2.60      | 50-2.72     | 50-2.78      | 50-2.92     |
| (Å)                                             | (2.68-2.63)                                      | (2.64-2.60)  | (2.77-2.72) | (2.83-2.78)  | (2.97-2.92) |
| Mosaicity (°)                                   | 0.49                                             | 1.75         | 0.43        | 0.57         | 0.28        |
| $\langle I \rangle / \langle \sigma(I) \rangle$ | 7.90 (2.58)                                      | 11.08 (5.64) | 8.45 (2.03) | 10.18 (2.93) | 6.53 (2.17) |
| Space group                                     | $P4_32_12$                                       | $P4_32_12$   | $P4_32_12$  | $P4_32_12$   | $P4_32_12$  |

|                             |                                |                                |                                |                                |                                |
|-----------------------------|--------------------------------|--------------------------------|--------------------------------|--------------------------------|--------------------------------|
| Cell dimension              | $a = 78.49$                    | $a = 78.33$                    | $a = 78.56$                    | $a = 78.58$                    | $a = 78.79$                    |
| $a, b, c$ (Å)               | $b = 78.49$                    | $b = 78.33$                    | $b = 78.56$                    | $b = 78.58$                    | $b = 78.79$                    |
|                             | $c = 38.55$                    | $c = 38.53$                    | $c = 38.47$                    | $c = 38.61$                    | $c = 38.25$                    |
| $\alpha, \beta, \gamma$ (°) | $\alpha = \beta = \gamma = 90$ |
| Exposure time<br>(min)      | 5                              |                                |                                |                                |                                |
| Oscillation angle<br>(°)    | 1                              |                                |                                |                                |                                |
| Detector distance<br>(mm)   | 200                            |                                |                                |                                |                                |
| Wavelength (Å)              | 1.54178                        |                                |                                |                                |                                |

Values in parentheses are for the highest resolution shell.

|                                                 | Diffraction data statistics of lysozyme crystals |                                |                                |                                |                                |
|-------------------------------------------------|--------------------------------------------------|--------------------------------|--------------------------------|--------------------------------|--------------------------------|
|                                                 | Crystal 11                                       | Crystal 12                     | Crystal 13                     | Crystal 14                     | Crystal 15                     |
| Resolution range                                | 50-2.92                                          | 50-2.98                        | 50-2.99                        | 50-3.09                        | 50-3.10                        |
| (Å)                                             | (2.97-2.92)                                      | (3.03-2.98)                    | (3.04-2.99)                    | (3.14-3.09)                    | (3.15-3.10)                    |
| Mosaicity (°)                                   | 0.60                                             | 0.36                           | 0.31                           | 1.01                           | 0.32                           |
| $\langle I \rangle / \langle \sigma(I) \rangle$ | 8.07 (3.55)                                      | 5.48 (2.48)                    | 5.42 (3.06)                    | 7.74 (2.49)                    | 6.89 (2.05)                    |
| Space group                                     | $P4_32_12$                                       | $P4_32_12$                     | $P4_32_12$                     | $P4_32_12$                     | $P4_32_12$                     |
| Cell dimension                                  | $a = 78.72$                                      | $a = 78.78$                    | $a = 77.92$                    | $a = 77.98$                    | $a = 78.80$                    |
| $a, b, c$ (Å)                                   | $b = 78.72$                                      | $b = 78.78$                    | $b = 77.92$                    | $b = 77.98$                    | $b = 78.80$                    |
|                                                 | $c = 38.01$                                      | $c = 38.02$                    | $c = 37.28$                    | $c = 38.84$                    | $c = 38.26$                    |
| $\alpha, \beta, \gamma$ (°)                     | $\alpha = \beta = \gamma = 90$                   | $\alpha = \beta = \gamma = 90$ | $\alpha = \beta = \gamma = 90$ | $\alpha = \beta = \gamma = 90$ | $\alpha = \beta = \gamma = 90$ |
| Exposure time<br>(min)                          | 5                                                |                                |                                |                                |                                |
| Oscillation angle<br>(°)                        | 1                                                |                                |                                |                                |                                |
| Detector distance                               | 200                                              |                                |                                |                                |                                |

---

|                |         |
|----------------|---------|
| (mm)           |         |
| Wavelength (Å) | 1.54178 |

---

Values in parentheses are for the highest resolution shell.

|                                                 | Diffraction data statistics of lysozyme crystals |                                |                                |
|-------------------------------------------------|--------------------------------------------------|--------------------------------|--------------------------------|
|                                                 | Crystal 16                                       | Crystal 17                     | Crystal 18                     |
| Resolution range                                | 50-3.17                                          | 50-3.37                        | 50-3.54                        |
| (Å)                                             | (3.22-3.17)                                      | (3.43-3.37)                    | (3.60-3.54)                    |
| Mosaicity (°)                                   | 0.3                                              | 0.20                           | 0.19                           |
| $\langle I \rangle / \langle \sigma(I) \rangle$ | 6.36 (3.54)                                      | 5.81 (2.07)                    | 5.26 (2.02)                    |
| Space group                                     | $P4_32_12$                                       | $P4_32_12$                     | $P4_32_12$                     |
| Cell dimension                                  | $a = 78.40$                                      | $a = 78.49$                    | $a = 78.97$                    |
| $a, b, c$ (Å)                                   | $b = 78.40$                                      | $b = 78.49$                    | $b = 78.97$                    |
|                                                 | $c = 38.46$                                      | $c = 38.51$                    | $c = 38.32$                    |
| $\alpha, \beta, \gamma$ (°)                     | $\alpha = \beta = \gamma = 90$                   | $\alpha = \beta = \gamma = 90$ | $\alpha = \beta = \gamma = 90$ |
| Exposure time                                   |                                                  | 5                              |                                |
| (min)                                           |                                                  |                                |                                |
| Oscillation angle                               |                                                  | 1                              |                                |
| (°)                                             |                                                  |                                |                                |
| Detector distance                               |                                                  | 200                            |                                |
| (mm)                                            |                                                  |                                |                                |
| Wavelength (Å)                                  |                                                  | 1.54178                        |                                |

---

Values in parentheses are for the highest resolution shell.

**Table S3** X-ray diffraction data statistics of lysozyme crystals obtained under simulated 2g condition in the superconducting magnet with lysozyme concentration 20 mg/ml.

|                                                 | Diffraction data statistics of lysozyme crystals |                                |                                |                                |                                |
|-------------------------------------------------|--------------------------------------------------|--------------------------------|--------------------------------|--------------------------------|--------------------------------|
|                                                 | Crystal 1                                        | Crystal 2                      | Crystal 3                      | Crystal 4                      | Crystal 5                      |
| Resolution range                                | 50-2.21                                          | 50-2.22                        | 50-2.43                        | 50-2.52                        | 50-2.74                        |
| (Å)                                             | (2.25-2.21)                                      | (2.26-2.22)                    | (2.47-2.43)                    | (2.56-2.52)                    | (2.79-2.74)                    |
| Mosaicity (°)                                   | 0.49                                             | 0.56                           | 1.15                           | 0.50                           | 0.42                           |
| $\langle I \rangle / \langle \sigma(I) \rangle$ | 12.90 (2.18)                                     | 10.85 (2.79)                   | 10.47 (2.69)                   | 9.48 (2.42)                    | 7.46 (2.47)                    |
| Space group                                     | $P4_32_12$                                       | $P4_32_12$                     | $P4_32_12$                     | $P4_32_12$                     | $P4_32_12$                     |
| Cell dimension                                  | $a = 78.43$                                      | $a = 78.85$                    | $a = 78.44$                    | $a = 78.38$                    | $a = 78.63$                    |
| $a, b, c$ (Å)                                   | $b = 78.43$                                      | $b = 78.85$                    | $b = 78.44$                    | $b = 78.38$                    | $b = 78.63$                    |
|                                                 | $c = 38.08$                                      | $c = 37.79$                    | $c = 38.21$                    | $c = 38.34$                    | $c = 38.10$                    |
| $\alpha, \beta, \gamma$ (°)                     | $\alpha = \beta = \gamma = 90$                   | $\alpha = \beta = \gamma = 90$ | $\alpha = \beta = \gamma = 90$ | $\alpha = \beta = \gamma = 90$ | $\alpha = \beta = \gamma = 90$ |
| Exposure time<br>(min)                          |                                                  |                                | 5                              |                                |                                |
| Oscillation angle<br>(°)                        |                                                  |                                | 1                              |                                |                                |
| Detector distance<br>(mm)                       |                                                  |                                | 200                            |                                |                                |
| Wavelength (Å)                                  |                                                  |                                | 1.54178                        |                                |                                |

Values in parentheses are for the highest resolution shell.

|                                                 | Diffraction data statistics of lysozyme crystals |             |             |             |             |
|-------------------------------------------------|--------------------------------------------------|-------------|-------------|-------------|-------------|
|                                                 | Crystal 6                                        | Crystal 7   | Crystal 8   | Crystal 9   | Crystal 10  |
| Resolution range                                | 50-2.83                                          | 50-2.89     | 50-3.05     | 50-3.05     | 50-3.12     |
| (Å)                                             | (2.88-2.83)                                      | (2.94-2.89) | (3.10-3.05) | (3.10-3.05) | (3.17-3.12) |
| Mosaicity (°)                                   | 0.65                                             | 0.26        | 0.43        | 0.90        | 0.18        |
| $\langle I \rangle / \langle \sigma(I) \rangle$ | 7.63 (2.52)                                      | 4.39 (2.72) | 6.65 (2.61) | 7.92 (7.98) | 5.18 (3.04) |
| Space group                                     | $P4_32_12$                                       | $P4_32_12$  | $P4_32_12$  | $P4_32_12$  | $P4_32_12$  |
| Cell dimension                                  | $a = 75.85$                                      | $a = 78.26$ | $a = 76.70$ | $a = 78.31$ | $a = 78.85$ |
| $a, b, c$ (Å)                                   | $b = 75.85$                                      | $b = 78.26$ | $b = 76.70$ | $b = 78.31$ | $b = 78.85$ |

|                             | $c = 36.87$                    | $c = 37.86$                    | $c = 37.23$                    | $c = 37.23$                    | $c = 38.35$                    |
|-----------------------------|--------------------------------|--------------------------------|--------------------------------|--------------------------------|--------------------------------|
| $\alpha, \beta, \gamma$ (°) | $\alpha = \beta = \gamma = 90$ |
| Exposure time<br>(min)      |                                |                                | 5                              |                                |                                |
| Oscillation angle<br>(°)    |                                |                                | 1                              |                                |                                |
| Detector distance<br>(mm)   |                                |                                | 200                            |                                |                                |
| Wavelength (Å)              |                                |                                | 1.54178                        |                                |                                |

Values in parentheses are for the highest resolution shell.

|                                                 | Diffraction data statistics of lysozyme crystals |                                           |
|-------------------------------------------------|--------------------------------------------------|-------------------------------------------|
|                                                 | Crystal 11                                       | Crystal 12                                |
| Resolution range<br>(Å)                         | 50-3.40<br>(3.46-3.40)                           | 50-3.81<br>(3.88-3.81)                    |
| Mosaicity (°)                                   | 0.22                                             | 0.89                                      |
| $\langle I \rangle / \langle \sigma(I) \rangle$ | 4.95 (2.24)                                      | 8.26 (13.06)                              |
| Space group                                     | $P4_32_12$                                       | $P4_32_12$                                |
| Cell dimension<br>$a, b, c$ (Å)                 | $a = 78.67$<br>$b = 78.67$<br>$c = 38.22$        | $a = 77.27$<br>$b = 77.27$<br>$c = 37.03$ |
| $\alpha, \beta, \gamma$ (°)                     | $\alpha = \beta = \gamma = 90$                   | $\alpha = \beta = \gamma = 90$            |
| Exposure time<br>(min)                          |                                                  | 5                                         |
| Oscillation angle<br>(°)                        |                                                  | 1                                         |
| Detector distance<br>(mm)                       |                                                  | 200                                       |
| Wavelength (Å)                                  |                                                  | 1.54178                                   |

Values in parentheses are for the highest resolution shell.



**Table S4** X-ray diffraction data statistics of lysozyme crystals obtained at the control group in normal gravity outside the superconducting magnet with lysozyme concentration 20 mg/ml.

|                                                 | Diffraction data statistics of lysozyme crystals |                                |                                |                                |                                |
|-------------------------------------------------|--------------------------------------------------|--------------------------------|--------------------------------|--------------------------------|--------------------------------|
|                                                 | Crystal 1                                        | Crystal 2                      | Crystal 3                      | Crystal 4                      | Crystal 5                      |
| Resolution range                                | 50-2.24                                          | 50-2.61                        | 50-2.66                        | 50-2.69                        | 50-2.70                        |
| (Å)                                             | (2.28-2.24)                                      | (2.66-2.61)                    | (2.71-2.66)                    | (2.74-2.69)                    | (2.75-2.70)                    |
| Mosaicity (°)                                   | 0.49                                             | 0.46                           | 1.02                           | 0.23                           | 0.79                           |
| $\langle I \rangle / \langle \sigma(I) \rangle$ | 9.39 (2.02)                                      | 8.96 (2.70)                    | 9.96 (2.46)                    | 8.89 (2.47)                    | 10.03 (2.12)                   |
| Space group                                     | $P4_32_12$                                       | $P4_32_12$                     | $P4_32_12$                     | $P4_32_12$                     | $P4_32_12$                     |
| Cell dimension                                  | $a = 78.76$                                      | $a = 79.05$                    | $a = 78.03$                    | $a = 77.98$                    | $a = 78.47$                    |
| $a, b, c$ (Å)                                   | $b = 78.76$                                      | $b = 79.05$                    | $b = 78.93$                    | $b = 77.98$                    | $b = 78.47$                    |
|                                                 | $c = 38.41$                                      | $c = 38.04$                    | $c = 37.59$                    | $c = 37.92$                    | $c = 37.79$                    |
| $\alpha, \beta, \gamma$ (°)                     | $\alpha = \beta = \gamma = 90$                   | $\alpha = \beta = \gamma = 90$ | $\alpha = \beta = \gamma = 90$ | $\alpha = \beta = \gamma = 90$ | $\alpha = \beta = \gamma = 90$ |
| Exposure time<br>(min)                          |                                                  |                                | 5                              |                                |                                |
| Oscillation angle<br>(°)                        |                                                  |                                | 1                              |                                |                                |
| Detector distance<br>(mm)                       |                                                  |                                | 200                            |                                |                                |
| Wavelength (Å)                                  |                                                  |                                | 1.54178                        |                                |                                |

Values in parentheses are for the highest resolution shell.

|                                                 | Diffraction data statistics of lysozyme crystals |             |             |             |              |
|-------------------------------------------------|--------------------------------------------------|-------------|-------------|-------------|--------------|
|                                                 | Crystal 6                                        | Crystal 7   | Crystal 8   | Crystal 9   | Crystal 10   |
| Resolution range                                | 50-2.77                                          | 50-2.79     | 50-2.85     | 50-2.94     | 50-2.95      |
| (Å)                                             | (2.82-2.77)                                      | (2.84-2.79) | (2.90-2.85) | (2.99-2.94) | (3.00-2.95)  |
| Mosaicity (°)                                   | 0.21                                             | 0.92        | 0.61        | 0.26        | 0.01         |
| $\langle I \rangle / \langle \sigma(I) \rangle$ | 8.01 (2.26)                                      | 8.66 (2.01) | 7.86 (2.34) | 7.11 (2.08) | 12.82 (3.03) |
| Space group                                     | $P4_32_12$                                       | $P4_32_12$  | $P4_32_12$  | $P4_32_12$  | $P4_32_12$   |
| Cell dimension                                  | $a = 73.08$                                      | $a = 78.95$ | $a = 77.99$ | $a = 78.85$ | $a = 78.00$  |

|                             |                                |                                |                                |                                |                                |
|-----------------------------|--------------------------------|--------------------------------|--------------------------------|--------------------------------|--------------------------------|
| $a, b, c$ (Å)               | $b = 73.08$                    | $b = 78.95$                    | $b = 77.99$                    | $b = 78.85$                    | $b = 78.00$                    |
|                             | $c = 36.84$                    | $c = 37.88$                    | $c = 37.71$                    | $c = 38.29$                    | $c = 38.03$                    |
| $\alpha, \beta, \gamma$ (°) | $\alpha = \beta = \gamma = 90$ |
| Exposure time<br>(min)      | 5                              |                                |                                |                                |                                |
| Oscillation angle<br>(°)    | 1                              |                                |                                |                                |                                |
| Detector distance<br>(mm)   | 200                            |                                |                                |                                |                                |
| Wavelength (Å)              | 1.54178                        |                                |                                |                                |                                |

Values in parentheses are for the highest resolution shell.

| Diffraction data statistics of lysozyme crystals |                                           |                                           |                                           |                                           |
|--------------------------------------------------|-------------------------------------------|-------------------------------------------|-------------------------------------------|-------------------------------------------|
|                                                  | Crystal 11                                | Crystal 12                                | Crystal 13                                | Crystal 14                                |
| Resolution range<br>(Å)                          | 50-3.21<br>(3.27-3.21)                    | 50-3.24<br>(3.30-3.24)                    | 50-3.25<br>(3.31-3.25)                    | 50-3.52<br>(3.58-3.52)                    |
| Mosaicity (°)                                    | 2.16                                      | 0.65                                      | 0.47                                      | 0.33                                      |
| $\langle I \rangle / \langle \sigma(I) \rangle$  | 7.97 (2.23)                               | 4.79 (2.47)                               | 5.38 (2.03)                               | 6.14 (2.08)                               |
| Space group                                      | $P4_32_12$                                | $P4_32_12$                                | $P4_32_12$                                | $P4_32_12$                                |
| Cell dimension<br>$a, b, c$ (Å)                  | $a = 78.20$<br>$b = 78.20$<br>$c = 38.09$ | $a = 78.85$<br>$b = 78.85$<br>$c = 38.13$ | $a = 77.84$<br>$b = 77.84$<br>$c = 37.82$ | $a = 78.71$<br>$b = 78.71$<br>$c = 38.20$ |
| $\alpha, \beta, \gamma$ (°)                      | $\alpha = \beta = \gamma = 90$            |
| Exposure time<br>(min)                           | 5                                         |                                           |                                           |                                           |
| Oscillation angle<br>(°)                         | 1                                         |                                           |                                           |                                           |
| Detector distance<br>(mm)                        | 200                                       |                                           |                                           |                                           |
| Wavelength (Å)                                   | 1.54178                                   |                                           |                                           |                                           |

Values in parentheses are for the highest resolution shell.

**Table S5** X-ray diffraction data statistics of lysozyme crystals obtained under simulated  $\mu\text{g}$  condition in the superconducting magnet with lysozyme concentration 30 mg/ml.

|                                                 | Diffraction data statistics of lysozyme crystals |                                |                                |                                |                                |
|-------------------------------------------------|--------------------------------------------------|--------------------------------|--------------------------------|--------------------------------|--------------------------------|
|                                                 | Crystal 1                                        | Crystal 2                      | Crystal 3                      | Crystal 4                      | Crystal 5                      |
| Resolution range                                | 50-2.09                                          | 50-2.10                        | 50-2.17                        | 50-2.17                        | 50-2.18                        |
| (Å)                                             | (2.13-2.09)                                      | (2.14-2.10)                    | (2.21-2.17)                    | (2.21-2.17)                    | (2.22-2.18)                    |
| Mosaicity (°)                                   | 0.27                                             | 0.97                           | 0.20                           | 0.47                           | 0.35                           |
| $\langle I \rangle / \langle \sigma(I) \rangle$ | 10.96 (2.39)                                     | 12.60 (2.27)                   | 8.68 (2.01)                    | 9.40 (2.06)                    | 11.83 (4.49)                   |
| Space group                                     | $P4_32_12$                                       | $P4_32_12$                     | $P4_32_12$                     | $P4_32_12$                     | $P4_32_12$                     |
| Cell dimension                                  | $a = 78.69$                                      | $a = 78.69$                    | $a = 78.87$                    | $a = 78.40$                    | $a = 78.68$                    |
| $a, b, c$ (Å)                                   | $b = 78.69$                                      | $b = 78.69$                    | $b = 78.87$                    | $b = 78.40$                    | $b = 78.68$                    |
|                                                 | $c = 38.40$                                      | $c = 37.86$                    | $c = 38.08$                    | $c = 37.68$                    | $c = 37.92$                    |
| $\alpha, \beta, \gamma$ (°)                     | $\alpha = \beta = \gamma = 90$                   | $\alpha = \beta = \gamma = 90$ | $\alpha = \beta = \gamma = 90$ | $\alpha = \beta = \gamma = 90$ | $\alpha = \beta = \gamma = 90$ |
| Exposure time<br>(min)                          |                                                  |                                | 5                              |                                |                                |
| Oscillation angle<br>(°)                        |                                                  |                                | 1                              |                                |                                |
| Detector distance<br>(mm)                       | 175                                              | 175                            | 175                            | 175                            | 200                            |
| Wavelength (Å)                                  |                                                  |                                | 1.54178                        |                                |                                |

Values in parentheses are for the highest resolution shell.

|                                                 | Diffraction data statistics of lysozyme crystals |              |              |              |              |
|-------------------------------------------------|--------------------------------------------------|--------------|--------------|--------------|--------------|
|                                                 | Crystal 6                                        | Crystal 7    | Crystal 8    | Crystal 9    | Crystal 10   |
| Resolution range                                | 50-2.19                                          | 50-2.19      | 50-2.19      | 50-2.20      | 50-2.20      |
| (Å)                                             | (2.23-2.19)                                      | (2.23-2.19)  | (2.23-2.19)  | (2.24-2.20)  | (2.24-2.20)  |
| Mosaicity (°)                                   | 0.35                                             | 0.46         | 0.73         | 0.34         | 0.40         |
| $\langle I \rangle / \langle \sigma(I) \rangle$ | 15.31 (2.73)                                     | 15.58 (3.32) | 13.97 (2.93) | 12.20 (4.35) | 13.59 (3.02) |
| Space group                                     | $P4_32_12$                                       | $P4_32_12$   | $P4_32_12$   | $P4_32_12$   | $P4_32_12$   |
| Cell dimension                                  | $a = 78.58$                                      | $a = 78.43$  | $a = 78.58$  | $a = 79.04$  | $a = 78.66$  |
| $a, b, c$ (Å)                                   | $b = 78.58$                                      | $b = 78.43$  | $b = 78.58$  | $b = 79.04$  | $b = 78.66$  |

|                             |                                |                                |                                |                                |                                |
|-----------------------------|--------------------------------|--------------------------------|--------------------------------|--------------------------------|--------------------------------|
|                             | $c = 38.49$                    | $c = 37.80$                    | $c = 38.62$                    | $c = 38.17$                    | $c = 37.87$                    |
| $\alpha, \beta, \gamma$ (°) | $\alpha = \beta = \gamma = 90$ |
| Exposure time<br>(min)      |                                |                                | 5                              |                                |                                |
| Oscillation angle<br>(°)    |                                |                                | 1                              |                                |                                |
| Detector distance<br>(mm)   |                                |                                | 200                            |                                |                                |
| Wavelength (Å)              |                                |                                | 1.54178                        |                                |                                |

Values in parentheses are for the highest resolution shell.

| Diffraction data statistics of lysozyme crystals |                                           |                                           |                                           |                                           |                                           |
|--------------------------------------------------|-------------------------------------------|-------------------------------------------|-------------------------------------------|-------------------------------------------|-------------------------------------------|
|                                                  | Crystal 11                                | Crystal 12                                | Crystal 13                                | Crystal 14                                | Crystal 15                                |
| Resolution range<br>(Å)                          | 50-2.20<br>(2.24-2.20)                    | 50-2.21<br>(2.25-2.21)                    | 50-2.22<br>(2.26-2.22)                    | 50-2.22<br>(2.26-2.22)                    | 50-2.23<br>(2.27-2.23)                    |
| Mosaicity (°)                                    | 0.64                                      | 0.38                                      | 0.28                                      | 0.31                                      | 0.28                                      |
| $\langle I \rangle / \langle \sigma(I) \rangle$  | 11.82 (2.07)                              | 9.90 (2.25)                               | 8.87 (2.02)                               | 11.74 (2.20)                              | 12.50 (3.12)                              |
| Space group                                      | $P4_32_12$                                | $P4_32_12$                                | $P4_32_12$                                | $P4_32_12$                                | $P4_32_12$                                |
| Cell dimension<br>$a, b, c$ (Å)                  | $a = 78.96$<br>$b = 78.96$<br>$c = 38.16$ | $a = 79.08$<br>$b = 79.08$<br>$c = 37.96$ | $a = 78.35$<br>$b = 78.35$<br>$c = 38.59$ | $a = 78.88$<br>$b = 78.88$<br>$c = 38.10$ | $a = 78.57$<br>$b = 78.57$<br>$c = 38.16$ |
| $\alpha, \beta, \gamma$ (°)                      | $\alpha = \beta = \gamma = 90$            |
| Exposure time<br>(min)                           |                                           |                                           | 5                                         |                                           |                                           |
| Oscillation angle<br>(°)                         |                                           |                                           | 1                                         |                                           |                                           |
| Detector distance<br>(mm)                        | 150                                       | 200                                       | 175                                       | 200                                       | 200                                       |
| Wavelength (Å)                                   |                                           |                                           | 1.54178                                   |                                           |                                           |

Values in parentheses are for the highest resolution shell.

| Diffraction data statistics of lysozyme crystals |                                |                                |                                |                                |                                |
|--------------------------------------------------|--------------------------------|--------------------------------|--------------------------------|--------------------------------|--------------------------------|
|                                                  | Crystal 16                     | Crystal 17                     | Crystal 18                     | Crystal 19                     | Crystal 20                     |
| Resolution range                                 | 50-2.24                        | 50-2.24                        | 50-2.24                        | 50-2.26                        | 50-2.32                        |
| (Å)                                              | (2.28-2.24)                    | (2.28-2.24)                    | (2.28-2.24)                    | (2.30-2.26)                    | (2.36-2.32)                    |
| Mosaicity (°)                                    | 0.30                           | 0.27                           | 0.32                           | 1.27                           | 0.24                           |
| $\langle I \rangle / \langle \sigma(I) \rangle$  | 11.57 (3.62)                   | 8.89 (2.04)                    | 13.88 (4.63)                   | 13.70 (3.68)                   | 10.96 (2.03)                   |
| Space group                                      | $P4_32_12$                     | $P4_32_12$                     | $P4_32_12$                     | $P4_32_12$                     | $P4_32_12$                     |
| Cell dimension                                   | $a = 78.99$                    | $a = 78.89$                    | $a = 78.57$                    | $a = 78.79$                    | $a = 78.98$                    |
| $a, b, c$ (Å)                                    | $b = 78.99$                    | $b = 78.89$                    | $b = 78.57$                    | $b = 78.79$                    | $b = 78.98$                    |
|                                                  | $c = 38.01$                    | $c = 38.20$                    | $c = 38.40$                    | $c = 38.29$                    | $c = 38.05$                    |
| $\alpha, \beta, \gamma$ (°)                      | $\alpha = \beta = \gamma = 90$ |
| Exposure time<br>(min)                           |                                |                                | 5                              |                                |                                |
| Oscillation angle<br>(°)                         |                                |                                | 1                              |                                |                                |
| Detector distance<br>(mm)                        | 200                            | 175                            | 200                            | 200                            | 200                            |
| Wavelength (Å)                                   |                                |                                | 1.54178                        |                                |                                |

Values in parentheses are for the highest resolution shell.

| Diffraction data statistics of lysozyme crystals |                                |                                |                                |                                |                                |
|--------------------------------------------------|--------------------------------|--------------------------------|--------------------------------|--------------------------------|--------------------------------|
|                                                  | Crystal 21                     | Crystal 22                     | Crystal 23                     | Crystal 24                     | Crystal 25                     |
| Resolution range                                 | 50-2.35                        | 50-2.35                        | 50-2.36                        | 50-2.37                        | 50-2.38                        |
| (Å)                                              | (2.39-2.35)                    | (2.39-2.35)                    | (2.40-2.36)                    | (2.41-2.37)                    | (2.42-2.38)                    |
| Mosaicity (°)                                    | 0.22                           | 0.27                           | 0.41                           | 0.49                           | 0.38                           |
| $\langle I \rangle / \langle \sigma(I) \rangle$  | 7.82 (2.03)                    | 9.08 (2.09)                    | 9.01 (2.02)                    | 8.41 (2.04)                    | 12.39 (2.37)                   |
| Space group                                      | $P4_32_12$                     | $P4_32_12$                     | $P4_32_12$                     | $P4_32_12$                     | $P4_32_12$                     |
| Cell dimension                                   | $a = 78.96$                    | $a = 78.72$                    | $a = 78.04$                    | $a = 77.88$                    | $a = 80.38$                    |
| $a, b, c$ (Å)                                    | $b = 78.96$                    | $b = 78.72$                    | $b = 78.04$                    | $b = 77.88$                    | $b = 80.38$                    |
|                                                  | $c = 38.17$                    | $c = 38.10$                    | $c = 37.80$                    | $c = 38.13$                    | $c = 38.55$                    |
| $\alpha, \beta, \gamma$ (°)                      | $\alpha = \beta = \gamma = 90$ |

|                           |         |     |     |     |     |
|---------------------------|---------|-----|-----|-----|-----|
| Exposure time<br>(min)    | 5       |     |     |     |     |
| Oscillation angle<br>(°)  | 1       |     |     |     |     |
| Detector distance<br>(mm) | 175     | 200 | 200 | 175 | 200 |
| Wavelength (Å)            | 1.54178 |     |     |     |     |

Values in parentheses are for the highest resolution shell.

|                                                 | Diffraction data statistics of lysozyme crystals |                                           |                                           |                                           |                                           |
|-------------------------------------------------|--------------------------------------------------|-------------------------------------------|-------------------------------------------|-------------------------------------------|-------------------------------------------|
|                                                 | Crystal 26                                       | Crystal 27                                | Crystal 28                                | Crystal 29                                | Crystal 30                                |
| Resolution range<br>(Å)                         | 50-2.39<br>(2.43-2.39)                           | 50-2.40<br>(2.44-2.40)                    | 50-2.40<br>(2.44-2.40)                    | 50-2.41<br>(2.45-2.41)                    | 50-2.41<br>(2.45-2.41)                    |
| Mosaicity (°)                                   | 0.08                                             | 0.32                                      | 0.74                                      | 0.26                                      | 0.27                                      |
| $\langle I \rangle / \langle \sigma(I) \rangle$ | 8.38 (3.02)                                      | 8.92 (3.24)                               | 9.53 (2.99)                               | 7.54 (2.49)                               | 9.56 (2.39)                               |
| Space group                                     | $P4_32_12$                                       | $P4_32_12$                                | $P4_32_12$                                | $P4_32_12$                                | $P4_32_12$                                |
| Cell dimension<br>$a, b, c$ (Å)                 | $a = 78.54$<br>$b = 78.54$<br>$c = 38.57$        | $a = 78.51$<br>$b = 78.51$<br>$c = 38.06$ | $a = 78.09$<br>$b = 78.09$<br>$c = 38.05$ | $a = 78.60$<br>$b = 78.60$<br>$c = 38.18$ | $a = 78.71$<br>$b = 78.71$<br>$c = 37.91$ |
| $\alpha, \beta, \gamma$ (°)                     | $\alpha = \beta = \gamma = 90$                   | $\alpha = \beta = \gamma = 90$            | $\alpha = \beta = \gamma = 90$            | $\alpha = \beta = \gamma = 90$            | $\alpha = \beta = \gamma = 90$            |
| Exposure time<br>(min)                          | 5                                                |                                           |                                           |                                           |                                           |
| Oscillation angle<br>(°)                        | 1                                                |                                           |                                           |                                           |                                           |
| Detector distance<br>(mm)                       | 200                                              | 200                                       | 175                                       | 200                                       | 200                                       |
| Wavelength (Å)                                  | 1.54178                                          |                                           |                                           |                                           |                                           |

Values in parentheses are for the highest resolution shell.

|  | Diffraction data statistics of lysozyme crystals |            |            |            |            |
|--|--------------------------------------------------|------------|------------|------------|------------|
|  | Crystal 31                                       | Crystal 32 | Crystal 33 | Crystal 34 | Crystal 35 |

|                                                 |                                     |                                     |                                     |                                     |                                     |
|-------------------------------------------------|-------------------------------------|-------------------------------------|-------------------------------------|-------------------------------------|-------------------------------------|
| Resolution range                                | 50-2.49                             | 50-2.50                             | 50-2.52                             | 50-2.63                             | 50-2.70                             |
| (Å)                                             | (2.53-2.49)                         | (2.54-2.50)                         | (2.56-2.52)                         | (2.68-2.63)                         | (2.75-2.70)                         |
| Mosaicity (°)                                   | 0.27                                | 0.74                                | 0.33                                | 0.24                                | 0.20                                |
| $\langle I \rangle / \langle \sigma(I) \rangle$ | 8.57 (2.15)                         | 10.15 (2.24)                        | 9.08 (2.20)                         | 6.94 (2.13)                         | 5.87 (2.20)                         |
| Space group                                     | <i>P4<sub>3</sub>2<sub>1</sub>2</i> | <i>P4<sub>3</sub>2<sub>1</sub>2</i> | <i>P4<sub>3</sub>2<sub>1</sub>2</i> | <i>P4<sub>3</sub>2<sub>1</sub>2</i> | <i>P4<sub>3</sub>2<sub>1</sub>2</i> |
| Cell dimension                                  | <i>a</i> = 78.05                    | <i>a</i> = 78.71                    | <i>a</i> = 79.00                    | <i>a</i> = 79.01                    | <i>a</i> = 78.28                    |
| <i>a</i> , <i>b</i> , <i>c</i> (Å)              | <i>b</i> = 78.05                    | <i>b</i> = 78.71                    | <i>b</i> = 79.00                    | <i>b</i> = 79.01                    | <i>b</i> = 78.28                    |
|                                                 | <i>c</i> = 38.06                    | <i>c</i> = 38.30                    | <i>c</i> = 38.03                    | <i>c</i> = 38.03                    | <i>c</i> = 38.24                    |
| $\alpha$ , $\beta$ , $\gamma$ (°)               | $\alpha = \beta = \gamma = 90$      |
| Exposure time<br>(min)                          |                                     |                                     | 5                                   |                                     |                                     |
| Oscillation angle<br>(°)                        |                                     |                                     | 1                                   |                                     |                                     |
| Detector distance<br>(mm)                       | 200                                 | 190                                 | 190                                 | 150                                 | 175                                 |
| Wavelength (Å)                                  |                                     |                                     | 1.54178                             |                                     |                                     |

Values in parentheses are for the highest resolution shell.

| Diffraction data statistics of lysozyme crystals |                                     |                                     |                                     |                                     |                                     |
|--------------------------------------------------|-------------------------------------|-------------------------------------|-------------------------------------|-------------------------------------|-------------------------------------|
|                                                  | Crystal 36                          | Crystal 37                          | Crystal 38                          | Crystal 39                          | Crystal 40                          |
| Resolution range                                 | 50-2.76                             | 50-2.79                             | 50-2.84                             | 50-2.91                             | 50-2.93                             |
| (Å)                                              | (2.81-2.76)                         | (2.84-2.79)                         | (2.89-2.84)                         | (2.96-2.91)                         | (2.98-2.93)                         |
| Mosaicity (°)                                    | 0.27                                | 0.21                                | 0.46                                | 0.43                                | 0.30                                |
| $\langle I \rangle / \langle \sigma(I) \rangle$  | 6.69 (3.22)                         | 6.42 (2.02)                         | 7.93 (2.74)                         | 6.59 (2.23)                         | 6.34 (2.05)                         |
| Space group                                      | <i>P4<sub>3</sub>2<sub>1</sub>2</i> | <i>P4<sub>3</sub>2<sub>1</sub>2</i> | <i>P4<sub>3</sub>2<sub>1</sub>2</i> | <i>P4<sub>3</sub>2<sub>1</sub>2</i> | <i>P4<sub>3</sub>2<sub>1</sub>2</i> |
| Cell dimension                                   | <i>a</i> = 78.85                    | <i>a</i> = 78.94                    | <i>a</i> = 77.86                    | <i>a</i> = 77.93                    | <i>a</i> = 78.87                    |
| <i>a</i> , <i>b</i> , <i>c</i> (Å)               | <i>b</i> = 78.85                    | <i>b</i> = 78.94                    | <i>b</i> = 77.86                    | <i>b</i> = 77.93                    | <i>b</i> = 78.87                    |
|                                                  | <i>c</i> = 38.08                    | <i>c</i> = 38.05                    | <i>c</i> = 37.74                    | <i>c</i> = 75.19                    | <i>c</i> = 38.15                    |
| $\alpha$ , $\beta$ , $\gamma$ (°)                | $\alpha = \beta = \gamma = 90$      |
| Exposure time<br>(min)                           |                                     |                                     | 5                                   |                                     |                                     |

|                           |         |     |     |     |     |
|---------------------------|---------|-----|-----|-----|-----|
| Oscillation angle<br>(°)  | 1       |     |     |     |     |
| Detector distance<br>(mm) | 200     | 200 | 200 | 175 | 175 |
| Wavelength (Å)            | 1.54178 |     |     |     |     |

Values in parentheses are for the highest resolution shell.

|                                                 | Diffraction data statistics of lysozyme crystals |                                           |                                           |
|-------------------------------------------------|--------------------------------------------------|-------------------------------------------|-------------------------------------------|
|                                                 | Crystal 41                                       | Crystal 42                                | Crystal 43                                |
| Resolution range<br>(Å)                         | 50-2.94<br>(2.99-2.94)                           | 50-2.94<br>(2.99-2.94)                    | 50-2.95<br>(3.00-2.95)                    |
| Mosaicity (°)                                   | 0.14                                             | 0.36                                      | 0.20                                      |
| $\langle I \rangle / \langle \sigma(I) \rangle$ | 5.59 (2.01)                                      | 5.73 (2.40)                               | 6.30 (2.24)                               |
| Space group                                     | $P4_32_12$                                       | $P4_32_12$                                | $P4_32_12$                                |
| Cell dimension<br>$a, b, c$ (Å)                 | $a = 78.38$<br>$b = 78.38$<br>$c = 38.03$        | $a = 78.85$<br>$b = 78.85$<br>$c = 38.05$ | $a = 78.85$<br>$b = 78.85$<br>$c = 38.09$ |
| $\alpha, \beta, \gamma$ (°)                     | $\alpha = \beta = \gamma = 90$                   | $\alpha = \beta = \gamma = 90$            | $\alpha = \beta = \gamma = 90$            |
| Exposure time<br>(min)                          | 5                                                |                                           |                                           |
| Oscillation angle<br>(°)                        | 1                                                |                                           |                                           |
| Detector distance<br>(mm)                       | 200                                              |                                           |                                           |
| Wavelength (Å)                                  | 1.54178                                          |                                           |                                           |

Values in parentheses are for the highest resolution shell.



**Table S6** X-ray diffraction data statistics of lysozyme crystals obtained under simulated 1g condition in the superconducting magnet with lysozyme concentration 30 mg/ml.

|                                                 | Diffraction data statistics of lysozyme crystals |                                |                                |                                |                                |
|-------------------------------------------------|--------------------------------------------------|--------------------------------|--------------------------------|--------------------------------|--------------------------------|
|                                                 | Crystal 1                                        | Crystal 2                      | Crystal 3                      | Crystal 4                      | Crystal 5                      |
| Resolution range                                | 50-2.20                                          | 50-2.20                        | 50-2.21                        | 50-2.21                        | 50-2.22                        |
| (Å)                                             | (2.24-2.20)                                      | (2.24-2.20)                    | (2.25-2.21)                    | (2.25-2.21)                    | (2.26-2.22)                    |
| Mosaicity (°)                                   | 0.26                                             | 0.37                           | 0.33                           | 0.36                           | 0.30                           |
| $\langle I \rangle / \langle \sigma(I) \rangle$ | 9.83 (2.05)                                      | 11.00 (2.08)                   | 11.51 (2.74)                   | 9.54 (2.51)                    | 9.31 (2.20)                    |
| Space group                                     | $P4_32_12$                                       | $P4_32_12$                     | $P4_32_12$                     | $P4_32_12$                     | $P4_32_12$                     |
| Cell dimension                                  | $a = 78.65$                                      | $a = 78.42$                    | $a = 78.90$                    | $a = 78.94$                    | $a = 77.88$                    |
| $a, b, c$ (Å)                                   | $b = 78.65$                                      | $b = 78.42$                    | $b = 78.90$                    | $b = 78.94$                    | $b = 77.88$                    |
|                                                 | $c = 38.34$                                      | $c = 38.33$                    | $c = 38.20$                    | $c = 38.09$                    | $c = 38.03$                    |
| $\alpha, \beta, \gamma$ (°)                     | $\alpha = \beta = \gamma = 90$                   | $\alpha = \beta = \gamma = 90$ | $\alpha = \beta = \gamma = 90$ | $\alpha = \beta = \gamma = 90$ | $\alpha = \beta = \gamma = 90$ |
| Exposure time<br>(min)                          |                                                  |                                | 5                              |                                |                                |
| Oscillation angle<br>(°)                        |                                                  |                                | 1                              |                                |                                |
| Detector distance<br>(mm)                       | 175                                              | 200                            | 200                            | 200                            | 175                            |
| Wavelength (Å)                                  |                                                  |                                | 1.54178                        |                                |                                |

Values in parentheses are for the highest resolution shell.

|                                                 | Diffraction data statistics of lysozyme crystals |             |              |             |              |
|-------------------------------------------------|--------------------------------------------------|-------------|--------------|-------------|--------------|
|                                                 | Crystal 6                                        | Crystal 7   | Crystal 8    | Crystal 9   | Crystal 10   |
| Resolution range                                | 50-2.23                                          | 50-2.23     | 50-2.23      | 50-2.23     | 50-2.24      |
| (Å)                                             | (2.27-2.23)                                      | (2.27-2.23) | (2.27-2.23)  | (2.27-2.23) | (2.28-2.24)  |
| Mosaicity (°)                                   | 0.30                                             | 0.27        | 0.33         | 0.36        | 0.59         |
| $\langle I \rangle / \langle \sigma(I) \rangle$ | 9.00 (2.08)                                      | 9.63 (2.07) | 11.51 (3.93) | 9.58 (2.71) | 11.37 (2.18) |
| Space group                                     | $P4_32_12$                                       | $P4_32_12$  | $P4_32_12$   | $P4_32_12$  | $P4_32_12$   |
| Cell dimension                                  | $a = 78.93$                                      | $a = 78.71$ | $a = 78.52$  | $a = 75.93$ | $a = 78.57$  |
| $a, b, c$ (Å)                                   | $b = 78.93$                                      | $b = 78.71$ | $b = 78.52$  | $b = 75.93$ | $b = 78.57$  |

|                             |                                |                                |                                |                                |                                |
|-----------------------------|--------------------------------|--------------------------------|--------------------------------|--------------------------------|--------------------------------|
|                             | $c = 38.11$                    | $c = 38.42$                    | $c = 37.83$                    | $c = 38.66$                    | $c = 38.64$                    |
| $\alpha, \beta, \gamma$ (°) | $\alpha = \beta = \gamma = 90$ |
| Exposure time<br>(min)      |                                |                                | 5                              |                                |                                |
| Oscillation angle<br>(°)    |                                |                                | 1                              |                                |                                |
| Detector distance<br>(mm)   | 200                            | 200                            | 200                            | 175                            | 175                            |
| Wavelength (Å)              |                                |                                | 1.54178                        |                                |                                |

Values in parentheses are for the highest resolution shell.

|                                                 | Diffraction data statistics of lysozyme crystals |                                           |                                           |                                           |                                           |
|-------------------------------------------------|--------------------------------------------------|-------------------------------------------|-------------------------------------------|-------------------------------------------|-------------------------------------------|
|                                                 | Crystal 11                                       | Crystal 12                                | Crystal 13                                | Crystal 14                                | Crystal 15                                |
| Resolution range<br>(Å)                         | 50-2.25<br>(2.29-2.25)                           | 50-2.25<br>(2.29-2.25)                    | 50-2.28<br>(2.32-2.28)                    | 50-2.39<br>(2.43-2.39)                    | 50-2.40<br>(2.44-2.40)                    |
| Mosaicity (°)                                   | 0.33                                             | 0.54                                      | 0.54                                      | 0.66                                      | 0.28                                      |
| $\langle I \rangle / \langle \sigma(I) \rangle$ | 10.06 (2.22)                                     | 8.0 (2.90)                                | 10.69 (2.04)                              | 7.70 (2.01)                               | 7.91 (2.10)                               |
| Space group                                     | $P4_32_12$                                       | $P4_32_12$                                | $P4_32_12$                                | $P4_32_12$                                | $P4_32_12$                                |
| Cell dimension<br>$a, b, c$ (Å)                 | $a = 78.71$<br>$b = 78.71$<br>$c = 38.45$        | $a = 77.82$<br>$b = 77.82$<br>$c = 37.89$ | $a = 78.36$<br>$b = 78.36$<br>$c = 38.24$ | $a = 78.81$<br>$b = 78.81$<br>$c = 38.20$ | $a = 78.04$<br>$b = 78.04$<br>$c = 38.13$ |
| $\alpha, \beta, \gamma$ (°)                     | $\alpha = \beta = \gamma = 90$                   | $\alpha = \beta = \gamma = 90$            | $\alpha = \beta = \gamma = 90$            | $\alpha = \beta = \gamma = 90$            | $\alpha = \beta = \gamma = 90$            |
| Exposure time<br>(min)                          |                                                  |                                           | 5                                         |                                           |                                           |
| Oscillation angle<br>(°)                        |                                                  |                                           | 1                                         |                                           |                                           |
| Detector distance<br>(mm)                       | 200                                              | 175                                       | 200                                       | 185                                       | 175                                       |
| Wavelength (Å)                                  |                                                  |                                           | 1.54178                                   |                                           |                                           |

Values in parentheses are for the highest resolution shell.

| Diffraction data statistics of lysozyme crystals |                                |                                |                                |                                |                                |
|--------------------------------------------------|--------------------------------|--------------------------------|--------------------------------|--------------------------------|--------------------------------|
|                                                  | Crystal 16                     | Crystal 17                     | Crystal 18                     | Crystal 19                     | Crystal 20                     |
| Resolution range                                 | 50-2.40                        | 50-2.40                        | 50-2.46                        | 50-2.55                        | 50-2.60                        |
| (Å)                                              | (2.44-2.40)                    | (2.44-2.40)                    | (2.50-2.46)                    | (2.59-2.55)                    | (2.64-2.60)                    |
| Mosaicity (°)                                    | 0.35                           | 0.71                           | 0.44                           | 0.47                           | 0.34                           |
| $\langle I \rangle / \langle \sigma(I) \rangle$  | 10.58 (2.42)                   | 8.74 (2.44)                    | 8.51 (2.44)                    | 9.36 (3.10)                    | 8.21 (2.19)                    |
| Space group                                      | $P4_32_12$                     | $P4_32_12$                     | $P4_32_12$                     | $P4_32_12$                     | $P4_32_12$                     |
| Cell dimension                                   | $a = 78.96$                    | $a = 78.23$                    | $a = 78.49$                    | $a = 78.79$                    | $a = 78.82$                    |
| $a, b, c$ (Å)                                    | $b = 78.96$                    | $b = 78.23$                    | $b = 78.49$                    | $b = 78.79$                    | $b = 78.82$                    |
|                                                  | $c = 38.01$                    | $c = 38.69$                    | $c = 38.60$                    | $c = 38.08$                    | $c = 38.04$                    |
| $\alpha, \beta, \gamma$ (°)                      | $\alpha = \beta = \gamma = 90$ |
| Exposure time<br>(min)                           |                                |                                | 5                              |                                |                                |
| Oscillation angle<br>(°)                         |                                |                                | 1                              |                                |                                |
| Detector distance<br>(mm)                        | 190                            | 200                            | 175                            | 200                            | 200                            |
| Wavelength (Å)                                   |                                |                                | 1.54178                        |                                |                                |

Values in parentheses are for the highest resolution shell.

| Diffraction data statistics of lysozyme crystals |                                |                                |                                |                                |                                |
|--------------------------------------------------|--------------------------------|--------------------------------|--------------------------------|--------------------------------|--------------------------------|
|                                                  | Crystal 21                     | Crystal 22                     | Crystal 23                     | Crystal 24                     | Crystal 25                     |
| Resolution range                                 | 50-2.62                        | 50-2.69                        | 50-2.89                        | 50-2.95                        | 50-3.03                        |
| (Å)                                              | (2.67-2.62)                    | (2.74-2.69)                    | (2.94-2.89)                    | (3.00-2.95)                    | (3.08-3.03)                    |
| Mosaicity (°)                                    | 1.22                           | 1.46                           | 0.69                           | 0.61                           | 1.89                           |
| $\langle I \rangle / \langle \sigma(I) \rangle$  | 11.70 (2.66)                   | 13.22 (2.43)                   | 8.67 (2.14)                    | 8.27 (2.40)                    | 8.30 (2.90)                    |
| Space group                                      | $P4_32_12$                     | $P4_32_12$                     | $P4_32_12$                     | $P4_32_12$                     | $P4_32_12$                     |
| Cell dimension                                   | $a = 78.21$                    | $a = 77.80$                    | $a = 78.82$                    | $a = 78.74$                    | $a = 77.95$                    |
| $a, b, c$ (Å)                                    | $b = 78.21$                    | $b = 77.80$                    | $b = 78.82$                    | $b = 78.74$                    | $b = 77.95$                    |
|                                                  | $c = 38.88$                    | $c = 37.48$                    | $c = 38.25$                    | $c = 37.92$                    | $c = 37.72$                    |
| $\alpha, \beta, \gamma$ (°)                      | $\alpha = \beta = \gamma = 90$ |

|                           |         |     |     |     |     |
|---------------------------|---------|-----|-----|-----|-----|
| Exposure time<br>(min)    | 5       |     |     |     |     |
| Oscillation angle<br>(°)  | 1       |     |     |     |     |
| Detector distance<br>(mm) | 175     | 185 | 200 | 200 | 200 |
| Wavelength (Å)            | 1.54178 |     |     |     |     |

Values in parentheses are for the highest resolution shell.

|                                                 | Diffraction data statistics of lysozyme crystals |                                           |                                            |
|-------------------------------------------------|--------------------------------------------------|-------------------------------------------|--------------------------------------------|
|                                                 | Crystal 26                                       | Crystal 27                                | Crystal 28                                 |
| Resolution range<br>(Å)                         | 50-3.06<br>(3.11-3.06)                           | 50-3.07<br>(3.12-3.07)                    | 50-3.29<br>(3.35-3.29)                     |
| Mosaicity (°)                                   | 0.26                                             | 0.36                                      | 0.85                                       |
| $\langle I \rangle / \langle \sigma(I) \rangle$ | 5.44 (2.05)                                      | 8.53 (2.37)                               | 4.36 (2.57)                                |
| Space group                                     | $P4_32_12$                                       | $P4_32_12$                                | $P4_32_12$                                 |
| Cell dimension<br>$a, b, c$ (Å)                 | $a = 78.79$<br>$b = 78.79$<br>$c = 38.10$        | $a = 78.33$<br>$b = 78.33$<br>$c = 38.12$ | $a = 78.61$<br>$b = 78.61$<br>$c = 113.90$ |
| $\alpha, \beta, \gamma$ (°)                     | $\alpha = \beta = \gamma = 90$                   | $\alpha = \beta = \gamma = 90$            | $\alpha = \beta = \gamma = 90$             |
| Exposure time<br>(min)                          | 5                                                |                                           |                                            |
| Oscillation angle<br>(°)                        | 1                                                |                                           |                                            |
| Detector distance<br>(mm)                       | 175                                              | 200                                       | 175                                        |
| Wavelength (Å)                                  | 1.54178                                          |                                           |                                            |

Values in parentheses are for the highest resolution shell.

**Table S7** X-ray diffraction data statistics of lysozyme crystals obtained under simulated 2g condition in the superconducting magnet with lysozyme concentration 30 mg/ml.

|                                                 | Diffraction data statistics of lysozyme crystals |                                |                                |                                |                                |
|-------------------------------------------------|--------------------------------------------------|--------------------------------|--------------------------------|--------------------------------|--------------------------------|
|                                                 | Crystal 1                                        | Crystal 2                      | Crystal 3                      | Crystal 4                      | Crystal 5                      |
| Resolution range                                | 50-2.20                                          | 50-2.28                        | 50-2.52                        | 50-2.52                        | 50-2.52                        |
| (Å)                                             | (2.24-2.20)                                      | (2.32-2.28)                    | (2.56-2.52)                    | (2.56-2.52)                    | (2.56-2.52)                    |
| Mosaicity (°)                                   | 0.44                                             | 0.44                           | 0.25                           | 0.32                           | 0.76                           |
| $\langle I \rangle / \langle \sigma(I) \rangle$ | 11.94 (2.58)                                     | 9.54 (2.26)                    | 8.37 (2.44)                    | 7.61 (2.09)                    | 9.15 (2.45)                    |
| Space group                                     | $P4_32_12$                                       | $P4_32_12$                     | $P4_32_12$                     | $P4_32_12$                     | $P4_32_12$                     |
| Cell dimension                                  | $a = 78.49$                                      | $a = 77.81$                    | $a = 78.93$                    | $a = 78.26$                    | $a = 78.42$                    |
| $a, b, c$ (Å)                                   | $b = 78.49$                                      | $b = 77.81$                    | $b = 78.93$                    | $b = 78.26$                    | $b = 78.42$                    |
|                                                 | $c = 38.30$                                      | $c = 37.87$                    | $c = 38.03$                    | $c = 76.71$                    | $c = 38.12$                    |
| $\alpha, \beta, \gamma$ (°)                     | $\alpha = \beta = \gamma = 90$                   | $\alpha = \beta = \gamma = 90$ | $\alpha = \beta = \gamma = 90$ | $\alpha = \beta = \gamma = 90$ | $\alpha = \beta = \gamma = 90$ |
| Exposure time                                   | 5                                                |                                |                                |                                |                                |
| (min)                                           |                                                  |                                |                                |                                |                                |
| Oscillation angle                               | 1                                                |                                |                                |                                |                                |
| (°)                                             |                                                  |                                |                                |                                |                                |
| Detector distance                               | 200                                              | 200                            | 200                            | 200                            | 190                            |
| (mm)                                            |                                                  |                                |                                |                                |                                |
| Wavelength (Å)                                  | 1.54178                                          |                                |                                |                                |                                |

Values in parentheses are for the highest resolution shell.

|                                                 | Diffraction data statistics of lysozyme crystals |             |             |             |             |
|-------------------------------------------------|--------------------------------------------------|-------------|-------------|-------------|-------------|
|                                                 | Crystal 6                                        | Crystal 7   | Crystal 8   | Crystal 9   | Crystal 10  |
| Resolution range                                | 50-2.55                                          | 50-2.59     | 50-2.62     | 50-2.62     | 50-2.80     |
| (Å)                                             | (2.59-2.55)                                      | (2.63-2.59) | (2.67-2.62) | (2.67-2.62) | (2.85-2.80) |
| Mosaicity (°)                                   | 0.64                                             | 0.32        | 0.29        | 0.36        | 0.38        |
| $\langle I \rangle / \langle \sigma(I) \rangle$ | 8.03 (2.03)                                      | 9.66 (2.08) | 7.39 (2.29) | 7.98 (2.31) | 7.42 (2.05) |
| Space group                                     | $P4_32_12$                                       | $P4_32_12$  | $P4_32_12$  | $P4_32_12$  | $P4_32_12$  |

|                             |                                |                                |                                |                                |                                |
|-----------------------------|--------------------------------|--------------------------------|--------------------------------|--------------------------------|--------------------------------|
| Cell dimension              | $a = 78.62$                    | $a = 78.86$                    | $a = 78.89$                    | $a = 79.03$                    | $a = 78.59$                    |
| $a, b, c$ (Å)               | $b = 78.62$                    | $b = 78.86$                    | $b = 78.89$                    | $b = 79.03$                    | $b = 78.59$                    |
|                             | $c = 38.24$                    | $c = 38.16$                    | $c = 38.12$                    | $c = 38.09$                    | $c = 38.24$                    |
| $\alpha, \beta, \gamma$ (°) | $\alpha = \beta = \gamma = 90$ |
| Exposure time<br>(min)      | 5                              |                                |                                |                                |                                |
| Oscillation angle<br>(°)    | 1                              |                                |                                |                                |                                |
| Detector distance<br>(mm)   | 200                            |                                |                                |                                |                                |
| Wavelength (Å)              | 1.54178                        |                                |                                |                                |                                |

Values in parentheses are for the highest resolution shell.

|                                                 | Diffraction data statistics of lysozyme crystals |                                |                                |                                |                                |
|-------------------------------------------------|--------------------------------------------------|--------------------------------|--------------------------------|--------------------------------|--------------------------------|
|                                                 | Crystal 11                                       | Crystal 12                     | Crystal 13                     | Crystal 14                     | Crystal 15                     |
| Resolution range                                | 50-2.90                                          | 50-2.91                        | 50-2.91                        | 50-2.95                        | 50-2.97                        |
| (Å)                                             | (2.95-2.90)                                      | (2.96-2.91)                    | (2.96-2.91)                    | (3.00-2.95)                    | (3.02-2.97)                    |
| Mosaicity (°)                                   | 0.23                                             | 0.65                           | 2.96                           | 0.80                           | 0.26                           |
| $\langle I \rangle / \langle \sigma(I) \rangle$ | 5.61 (2.16)                                      | 6.32 (2.52)                    | 13.10 (2.80)                   | 12.93 (2.40)                   | 7.11 (2.90)                    |
| Space group                                     | $P4_32_12$                                       | $P4_32_12$                     | $P4_32_12$                     | $P4_32_12$                     | $P4_32_12$                     |
| Cell dimension                                  | $a = 78.78$                                      | $a = 78.77$                    | $a = 77.52$                    | $a = 78.72$                    | $a = 76.84$                    |
| $a, b, c$ (Å)                                   | $b = 78.78$                                      | $b = 78.77$                    | $b = 77.52$                    | $b = 78.72$                    | $b = 76.84$                    |
|                                                 | $c = 38.06$                                      | $c = 38.18$                    | $c = 36.53$                    | $c = 37.89$                    | $c = 37.11$                    |
| $\alpha, \beta, \gamma$ (°)                     | $\alpha = \beta = \gamma = 90$                   | $\alpha = \beta = \gamma = 90$ | $\alpha = \beta = \gamma = 90$ | $\alpha = \beta = \gamma = 90$ | $\alpha = \beta = \gamma = 90$ |
| Exposure time<br>(min)                          | 5                                                |                                |                                |                                |                                |
| Oscillation angle<br>(°)                        | 1                                                |                                |                                |                                |                                |
| Detector distance                               | 200                                              |                                |                                |                                |                                |

|                |         |
|----------------|---------|
| (mm)           |         |
| Wavelength (Å) | 1.54178 |

Values in parentheses are for the highest resolution shell.

|                                                 | Diffraction data statistics of lysozyme crystals |                                |                                |                                |                                |
|-------------------------------------------------|--------------------------------------------------|--------------------------------|--------------------------------|--------------------------------|--------------------------------|
|                                                 | Crystal 16                                       | Crystal 17                     | Crystal 18                     | Crystal 19                     | Crystal 20                     |
| Resolution range                                | 50-3.07                                          | 50-3.10                        | 50-3.11                        | 50-3.12                        | 50-3.20                        |
| (Å)                                             | (3.12-3.07)                                      | (3.15-3.10)                    | (3.16-3.11)                    | (3.17-3.12)                    | (3.26-3.20)                    |
| Mosaicity (°)                                   | 0.24                                             | 1.12                           | 1.68                           | 0.20                           | 0.25                           |
| $\langle I \rangle / \langle \sigma(I) \rangle$ | 6.40 (2.39)                                      | 8.69 (2.35)                    | 9.15 (2.17)                    | 4.88 (2.25)                    | 5.09 (2.75)                    |
| Space group                                     | $P4_32_12$                                       | $P4_32_12$                     | $P4_32_12$                     | $P4_32_12$                     | $P4_32_12$                     |
| Cell dimension                                  | $a = 78.49$                                      | $a = 78.52$                    | $a = 77.75$                    | $a = 78.97$                    | $a = 79.03$                    |
| $a, b, c$ (Å)                                   | $b = 78.49$                                      | $b = 78.52$                    | $b = 77.75$                    | $b = 78.97$                    | $b = 79.03$                    |
|                                                 | $c = 38.58$                                      | $c = 38.70$                    | $c = 38.62$                    | $c = 38.05$                    | $c = 37.91$                    |
| $\alpha, \beta, \gamma$ (°)                     | $\alpha = \beta = \gamma = 90$                   | $\alpha = \beta = \gamma = 90$ | $\alpha = \beta = \gamma = 90$ | $\alpha = \beta = \gamma = 90$ | $\alpha = \beta = \gamma = 90$ |
| Exposure time                                   | 5                                                |                                |                                |                                |                                |
| (min)                                           |                                                  |                                |                                |                                |                                |
| Oscillation angle                               | 1                                                |                                |                                |                                |                                |
| (°)                                             |                                                  |                                |                                |                                |                                |
| Detector distance                               | 200                                              |                                |                                |                                |                                |
| (mm)                                            |                                                  |                                |                                |                                |                                |
| Wavelength (Å)                                  | 1.54178                                          |                                |                                |                                |                                |

Values in parentheses are for the highest resolution shell.

| Diffraction data statistics of lysozyme crystals |             |
|--------------------------------------------------|-------------|
| Crystal 21                                       |             |
| Resolution range                                 | 50-3.41     |
| (Å)                                              | (3.47-3.41) |
| Mosaicity (°)                                    | 0.23        |

---

|                                                 |                                |
|-------------------------------------------------|--------------------------------|
| $\langle I \rangle / \langle \sigma(I) \rangle$ | 3.85 (2.17)                    |
| Space group                                     | $P4_32_12$                     |
| Cell dimension                                  | $a = 111.66$                   |
| $a, b, c$ (Å)                                   | $b = 111.66$                   |
|                                                 | $c = 38.26$                    |
| $\alpha, \beta, \gamma$ (°)                     | $\alpha = \beta = \gamma = 90$ |
| Exposure time                                   | 5                              |
| (min)                                           |                                |
| Oscillation angle                               | 1                              |
| (°)                                             |                                |
| Detector distance                               | 200                            |
| (mm)                                            |                                |
| Wavelength (Å)                                  | 1.54178                        |

---

Values in parentheses are for the highest resolution shell.



**Table S8** X-ray diffraction data statistics of lysozyme crystals obtained at the control group in normal gravity outside the superconducting magnet with lysozyme concentration 30 mg/ml.

|                                                 | Diffraction data statistics of lysozyme crystals |                                |                                |                                |                                |
|-------------------------------------------------|--------------------------------------------------|--------------------------------|--------------------------------|--------------------------------|--------------------------------|
|                                                 | Crystal 1                                        | Crystal 2                      | Crystal 3                      | Crystal 4                      | Crystal 5                      |
| Resolution range                                | 50-2.12                                          | 50-2.21                        | 50-2.21                        | 50-2.24                        | 50-2.25                        |
| (Å)                                             | (2.16-2.12)                                      | (2.25-2.21)                    | (2.25-2.21)                    | (2.28-2.24)                    | (2.29-2.25)                    |
| Mosaicity (°)                                   | 0.52                                             | 0.46                           | 0.59                           | 0.59                           | 0.56                           |
| $\langle I \rangle / \langle \sigma(I) \rangle$ | 15.29 (2.98)                                     | 10.87 (3.21)                   | 9.35 (2.48)                    | 12.14 (2.32)                   | 10.91 (2.30)                   |
| Space group                                     | $P4_32_12$                                       | $P4_32_12$                     | $P4_32_12$                     | $P4_32_12$                     | $P4_32_12$                     |
| Cell dimension                                  | $a = 78.80$                                      | $a = 78.75$                    | $a = 78.42$                    | $a = 78.68$                    | $a = 78.95$                    |
| $a, b, c$ (Å)                                   | $b = 78.80$                                      | $b = 78.75$                    | $b = 78.42$                    | $b = 78.68$                    | $b = 78.95$                    |
|                                                 | $c = 37.92$                                      | $c = 38.09$                    | $c = 38.53$                    | $c = 38.27$                    | $c = 38.06$                    |
| $\alpha, \beta, \gamma$ (°)                     | $\alpha = \beta = \gamma = 90$                   | $\alpha = \beta = \gamma = 90$ | $\alpha = \beta = \gamma = 90$ | $\alpha = \beta = \gamma = 90$ | $\alpha = \beta = \gamma = 90$ |
| Exposure time<br>(min)                          |                                                  |                                | 5                              |                                |                                |
| Oscillation angle<br>(°)                        |                                                  |                                | 1                              |                                |                                |
| Detector distance<br>(mm)                       | 185                                              | 200                            | 200                            | 185                            | 200                            |
| Wavelength (Å)                                  |                                                  |                                | 1.54178                        |                                |                                |

Values in parentheses are for the highest resolution shell.

|                                                 | Diffraction data statistics of lysozyme crystals |             |             |             |             |
|-------------------------------------------------|--------------------------------------------------|-------------|-------------|-------------|-------------|
|                                                 | Crystal 6                                        | Crystal 7   | Crystal 8   | Crystal 9   | Crystal 10  |
| Resolution range                                | 50-2.40                                          | 50-2.41     | 50-2.44     | 50-2.50     | 50-2.51     |
| (Å)                                             | (2.44-2.40)                                      | (2.54-2.41) | (2.48-2.44) | (2.54-2.50) | (2.55-2.51) |
| Mosaicity (°)                                   | 0.27                                             | 0.58        | 0.27        | 0.49        | 0.42        |
| $\langle I \rangle / \langle \sigma(I) \rangle$ | 7.84 (2.02)                                      | 8.83 (2.12) | 7.30 (2.04) | 8.42 (2.16) | 7.75 (2.08) |
| Space group                                     | $P4_32_12$                                       | $P4_32_12$  | $P4_32_12$  | $P4_32_12$  | $P4_32_12$  |

|                             |                                |                                |                                |                                |                                |
|-----------------------------|--------------------------------|--------------------------------|--------------------------------|--------------------------------|--------------------------------|
| Cell dimension              | $a = 78.85$                    | $a = 78.87$                    | $a = 78.91$                    | $a = 78.35$                    | $a = 78.69$                    |
| $a, b, c$ (Å)               | $b = 78.85$                    | $b = 78.87$                    | $b = 78.91$                    | $b = 78.35$                    | $b = 78.69$                    |
|                             | $c = 38.06$                    | $c = 38.10$                    | $c = 38.06$                    | $c = 38.59$                    | $c = 38.08$                    |
| $\alpha, \beta, \gamma$ (°) | $\alpha = \beta = \gamma = 90$ |
| Exposure time<br>(min)      | 5                              |                                |                                |                                |                                |
| Oscillation angle<br>(°)    | 1                              |                                |                                |                                |                                |
| Detector distance<br>(mm)   | 200                            |                                |                                |                                |                                |
| Wavelength (Å)              | 1.54178                        |                                |                                |                                |                                |

Values in parentheses are for the highest resolution shell.

|                                                 | Diffraction data statistics of lysozyme crystals |                                |                                |                                |                                |
|-------------------------------------------------|--------------------------------------------------|--------------------------------|--------------------------------|--------------------------------|--------------------------------|
|                                                 | Crystal 11                                       | Crystal 12                     | Crystal 13                     | Crystal 14                     | Crystal 15                     |
| Resolution range                                | 50-2.60                                          | 50-2.61                        | 50-2.67                        | 50-2.69                        | 50-2.70                        |
| (Å)                                             | (2.64-2.60)                                      | (2.66-2.61)                    | (2.72-2.67)                    | (2.54-2.69)                    | (2.75-2.70)                    |
| Mosaicity (°)                                   | 0.71                                             | 0.88                           | 0.43                           | 0.28                           | 1.04                           |
| $\langle I \rangle / \langle \sigma(I) \rangle$ | 8.28 (2.25)                                      | 9.28 (2.79)                    | 11.11 (2.73)                   | 8.23 (2.08)                    | 8.44 (3.17)                    |
| Space group                                     | $P4_32_12$                                       | $P4_32_12$                     | $P4_32_12$                     | $P4_32_12$                     | $P4_32_12$                     |
| Cell dimension                                  | $a = 78.41$                                      | $a = 78.53$                    | $a = 78.38$                    | $a = 78.36$                    | $a = 78.07$                    |
| $a, b, c$ (Å)                                   | $b = 78.41$                                      | $b = 78.53$                    | $b = 78.38$                    | $b = 78.36$                    | $b = 78.07$                    |
|                                                 | $c = 37.40$                                      | $c = 38.09$                    | $c = 38.37$                    | $c = 38.60$                    | $c = 38.50$                    |
| $\alpha, \beta, \gamma$ (°)                     | $\alpha = \beta = \gamma = 90$                   | $\alpha = \beta = \gamma = 90$ | $\alpha = \beta = \gamma = 90$ | $\alpha = \beta = \gamma = 90$ | $\alpha = \beta = \gamma = 90$ |
| Exposure time<br>(min)                          | 5                                                |                                |                                |                                |                                |
| Oscillation angle<br>(°)                        | 1                                                |                                |                                |                                |                                |
| Detector distance                               | 200                                              |                                |                                |                                |                                |

|                |         |
|----------------|---------|
| (mm)           |         |
| Wavelength (Å) | 1.54178 |

Values in parentheses are for the highest resolution shell.

|                                                 | Diffraction data statistics of lysozyme crystals |                                |                                |                                |                                |
|-------------------------------------------------|--------------------------------------------------|--------------------------------|--------------------------------|--------------------------------|--------------------------------|
|                                                 | Crystal 16                                       | Crystal 17                     | Crystal 18                     | Crystal 19                     | Crystal 20                     |
| Resolution range                                | 50-2.75                                          | 50-2.76                        | 50-2.76                        | 50-2.87                        | 50-3.01                        |
| (Å)                                             | (2.80-2.75)                                      | (2.81-2.76)                    | (2.81-2.76)                    | (2.92-2.87)                    | (3.06-3.01)                    |
| Mosaicity (°)                                   | 0.26                                             | 0.25                           | 0.43                           | 0.24                           | 1.41                           |
| $\langle I \rangle / \langle \sigma(I) \rangle$ | 7.83 (2.05)                                      | 7.39 (2.18)                    | 6.66 (2.49)                    | 8.57 (3.18)                    | 7.37 (11.73)                   |
| Space group                                     | $P4_32_12$                                       | $P4_32_12$                     | $P4_32_12$                     | $P4_32_12$                     | $P4_32_12$                     |
| Cell dimension                                  | $a = 78.93$                                      | $a = 79.17$                    | $a = 79.01$                    | $a = 78.95$                    | $a = 78.76$                    |
| $a, b, c$ (Å)                                   | $b = 78.93$                                      | $b = 79.17$                    | $b = 79.01$                    | $b = 78.95$                    | $b = 78.76$                    |
|                                                 | $c = 38.11$                                      | $c = 37.95$                    | $c = 38.07$                    | $c = 38.10$                    | $c = 37.83$                    |
| $\alpha, \beta, \gamma$ (°)                     | $\alpha = \beta = \gamma = 90$                   | $\alpha = \beta = \gamma = 90$ | $\alpha = \beta = \gamma = 90$ | $\alpha = \beta = \gamma = 90$ | $\alpha = \beta = \gamma = 90$ |
| Exposure time                                   |                                                  |                                | 5                              |                                |                                |
| (min)                                           |                                                  |                                |                                |                                |                                |
| Oscillation angle                               |                                                  |                                | 1                              |                                |                                |
| (°)                                             |                                                  |                                |                                |                                |                                |
| Detector distance                               |                                                  |                                | 200                            |                                |                                |
| (mm)                                            |                                                  |                                |                                |                                |                                |
| Wavelength (Å)                                  |                                                  |                                | 1.54178                        |                                |                                |

Values in parentheses are for the highest resolution shell.

|                  | Diffraction data statistics of lysozyme crystals |             |             |             |             |
|------------------|--------------------------------------------------|-------------|-------------|-------------|-------------|
|                  | Crystal 21                                       | Crystal 22  | Crystal 23  | Crystal 24  | Crystal 25  |
| Resolution range | 50-3.02                                          | 50-3.08     | 50-3.13     | 50-3.35     | 50-3.42     |
| (Å)              | (3.07-3.02)                                      | (3.13-3.08) | (3.18-3.13) | (3.41-3.35) | (3.48-3.42) |
| Mosaicity (°)    | 1.80                                             | 0.30        | 0.29        | 0.23        | 0.50        |

|                                                 |                                |                                |                                |                                |                                |
|-------------------------------------------------|--------------------------------|--------------------------------|--------------------------------|--------------------------------|--------------------------------|
| $\langle I \rangle / \langle \sigma(I) \rangle$ | 10.29 (4.59)                   | 5.42 (2.02)                    | 5.14 (2.25)                    | 4.98 (2.44)                    | 4.84 (2.65)                    |
| Space group                                     | $P4_32_12$                     | $P4_32_12$                     | $P4_32_12$                     | $P4_32_12$                     | $P4_32_12$                     |
| Cell dimension                                  | $a = 78.82$                    | $a = 78.82$                    | $a = 78.90$                    | $a = 78.92$                    | $a = 78.70$                    |
| $a, b, c$ (Å)                                   | $b = 78.82$                    | $b = 78.82$                    | $b = 78.90$                    | $b = 78.92$                    | $b = 78.70$                    |
|                                                 | $c = 38.09$                    | $c = 38.06$                    | $c = 38.36$                    | $c = 38.07$                    | $c = 38.20$                    |
| $\alpha, \beta, \gamma$ (°)                     | $\alpha = \beta = \gamma = 90$ |
| Exposure time<br>(min)                          |                                |                                | 5                              |                                |                                |
| Oscillation angle<br>(°)                        |                                |                                | 1                              |                                |                                |
| Detector distance<br>(mm)                       |                                |                                | 200                            |                                |                                |
| Wavelength (Å)                                  |                                |                                | 1.54178                        |                                |                                |

Values in parentheses are for the highest resolution shell.

**Table S9** X-ray diffraction data statistics of lysozyme crystals obtained under simulated  $\mu\text{g}$  condition in the superconducting magnet with lysozyme concentration 60 mg/ml.

| Diffraction data statistics of lysozyme crystals |                                |                                |                                |                                |                                |
|--------------------------------------------------|--------------------------------|--------------------------------|--------------------------------|--------------------------------|--------------------------------|
|                                                  | Crystal 1                      | Crystal 2                      | Crystal 3                      | Crystal 4                      | Crystal 5                      |
| Resolution range                                 | 50-2.04                        | 50-2.12                        | 50-2.13                        | 50-2.14                        | 50-2.14                        |
| (Å)                                              | (2.08-2.04)                    | (2.16-2.12)                    | (2.17-2.13)                    | (2.18-2.14)                    | (2.18-2.14)                    |
| Mosaicity (°)                                    | 0.51                           | 0.54                           | 0.32                           | 0.37                           | 0.47                           |
| $\langle I \rangle / \langle \sigma(I) \rangle$  | 14.46 (2.39)                   | 13.12 (3.08)                   | 17.50 (4.09)                   | 14.13 (3.71)                   | 12.79 (2.81)                   |
| Space group                                      | $P4_32_12$                     | $P4_32_12$                     | $P4_32_12$                     | $P4_32_12$                     | $P4_32_12$                     |
| Cell dimension                                   | $a = 78.06$                    | $a = 78.75$                    | $a = 78.40$                    | $a = 78.70$                    | $a = 78.75$                    |
| $a, b, c$ (Å)                                    | $b = 78.06$                    | $b = 78.75$                    | $b = 78.40$                    | $b = 78.70$                    | $b = 78.75$                    |
|                                                  | $c = 37.46$                    | $c = 38.15$                    | $c = 38.32$                    | $c = 38.17$                    | $c = 38.39$                    |
| $\alpha, \beta, \gamma$ (°)                      | $\alpha = \beta = \gamma = 90$ |
| Exposure time<br>(min)                           |                                |                                | 5                              |                                |                                |
| Oscillation angle<br>(°)                         |                                |                                | 1                              |                                |                                |
| Detector distance<br>(mm)                        | 175                            | 185                            | 185                            | 185                            | 185                            |
| Wavelength (Å)                                   |                                |                                | 1.54178                        |                                |                                |

Values in parentheses are for the highest resolution shell.

| Diffraction data statistics of lysozyme crystals |              |             |              |              |              |
|--------------------------------------------------|--------------|-------------|--------------|--------------|--------------|
|                                                  | Crystal 6    | Crystal 7   | Crystal 8    | Crystal 9    | Crystal 10   |
| Resolution range                                 | 50-2.15      | 50-2.15     | 50-2.16      | 50-2.18      | 50-2.18      |
| (Å)                                              | (2.19-2.15)  | (2.19-2.15) | (2.20-2.16)  | (2.22-2.18)  | (2.22-2.18)  |
| Mosaicity (°)                                    | 0.33         | 0.56        | 0.35         | 0.43         | 0.43         |
| $\langle I \rangle / \langle \sigma(I) \rangle$  | 12.62 (3.14) | 9.78 (3.08) | 12.18 (2.20) | 14.42 (2.42) | 20.70 (2.40) |
| Space group                                      | $P4_32_12$   | $P4_32_12$  | $P4_32_12$   | $P4_32_12$   | $P4_32_12$   |
| Cell dimension                                   | $a = 78.60$  | $a = 78.83$ | $a = 78.52$  | $a = 78.87$  | $a = 78.99$  |
| $a, b, c$ (Å)                                    | $b = 78.60$  | $b = 78.83$ | $b = 78.52$  | $b = 78.87$  | $b = 78.99$  |

|                             | $c = 38.14$                    | $c = 38.20$                    | $c = 38.06$                    | $c = 38.15$                    | $c = 38.06$                    |
|-----------------------------|--------------------------------|--------------------------------|--------------------------------|--------------------------------|--------------------------------|
| $\alpha, \beta, \gamma$ (°) | $\alpha = \beta = \gamma = 90$ |
| Exposure time<br>(min)      |                                |                                | 5                              |                                |                                |
| Oscillation angle<br>(°)    |                                |                                | 1                              |                                |                                |
| Detector distance<br>(mm)   | 190                            | 190                            | 185                            | 190                            | 200                            |
| Wavelength (Å)              |                                |                                | 1.54178                        |                                |                                |

Values in parentheses are for the highest resolution shell.

|                                                 | Diffraction data statistics of lysozyme crystals |                                           |                                           |                                           |                                           |
|-------------------------------------------------|--------------------------------------------------|-------------------------------------------|-------------------------------------------|-------------------------------------------|-------------------------------------------|
|                                                 | Crystal 11                                       | Crystal 12                                | Crystal 13                                | Crystal 14                                | Crystal 15                                |
| Resolution range<br>(Å)                         | 50-2.19<br>(2.23-2.19)                           | 50-2.19<br>(2.23-2.19)                    | 50-2.19<br>(2.23-2.19)                    | 50-2.19<br>(2.23-2.19)                    | 50-2.20<br>(2.24-2.20)                    |
| Mosaicity (°)                                   | 0.29                                             | 0.30                                      | 0.31                                      | 0.48                                      | 0.37                                      |
| $\langle I \rangle / \langle \sigma(I) \rangle$ | 11.02 (2.14)                                     | 11.09 (3.05)                              | 14.33 (2.87)                              | 14.34 (3.38)                              | 11.30 (2.01)                              |
| Space group                                     | $P4_32_12$                                       | $P4_32_12$                                | $P4_32_12$                                | $P4_32_12$                                | $P4_32_12$                                |
| Cell dimension<br>$a, b, c$ (Å)                 | $a = 78.73$<br>$b = 78.73$<br>$c = 37.82$        | $a = 78.82$<br>$b = 78.82$<br>$c = 37.87$ | $a = 78.85$<br>$b = 78.85$<br>$c = 37.91$ | $a = 78.22$<br>$b = 78.22$<br>$c = 37.93$ | $a = 78.88$<br>$b = 78.88$<br>$c = 38.06$ |
| $\alpha, \beta, \gamma$ (°)                     | $\alpha = \beta = \gamma = 90$                   | $\alpha = \beta = \gamma = 90$            | $\alpha = \beta = \gamma = 90$            | $\alpha = \beta = \gamma = 90$            | $\alpha = \beta = \gamma = 90$            |
| Exposure time<br>(min)                          |                                                  |                                           | 5                                         |                                           |                                           |
| Oscillation angle<br>(°)                        |                                                  |                                           | 1                                         |                                           |                                           |
| Detector distance<br>(mm)                       | 200                                              | 200                                       | 200                                       | 200                                       | 185                                       |
| Wavelength (Å)                                  |                                                  |                                           | 1.54178                                   |                                           |                                           |

Values in parentheses are for the highest resolution shell.

| Diffraction data statistics of lysozyme crystals |                                |                                |                                |                                |                                |
|--------------------------------------------------|--------------------------------|--------------------------------|--------------------------------|--------------------------------|--------------------------------|
|                                                  | Crystal 16                     | Crystal 17                     | Crystal 18                     | Crystal 19                     | Crystal 20                     |
| Resolution range                                 | 50-2.20                        | 50-2.20                        | 50-2.21                        | 50-2.21                        | 50-2.21                        |
| (Å)                                              | (2.24-2.20)                    | (2.24-2.20)                    | (2.25-2.21)                    | (2.25-2.21)                    | (2.25-2.21)                    |
| Mosaicity (°)                                    | 0.38                           | 0.70                           | 0.40                           | 0.41                           | 0.53                           |
| $\langle I \rangle / \langle \sigma(I) \rangle$  | 10.42 (2.84)                   | 12.35 (2.77)                   | 10.92 (6.29)                   | 10.75 (5.19)                   | 13.05 (2.79)                   |
| Space group                                      | $P4_32_12$                     | $P4_32_12$                     | $P4_32_12$                     | $P4_32_12$                     | $P4_32_12$                     |
| Cell dimension                                   | $a = 78.27$                    | $a = 78.30$                    | $a = 78.94$                    | $a = 78.96$                    | $a = 78.96$                    |
| $a, b, c$ (Å)                                    | $b = 78.27$                    | $b = 78.30$                    | $b = 78.94$                    | $b = 78.96$                    | $b = 78.96$                    |
|                                                  | $c = 38.28$                    | $c = 38.00$                    | $c = 37.83$                    | $c = 38.13$                    | $c = 38.04$                    |
| $\alpha, \beta, \gamma$ (°)                      | $\alpha = \beta = \gamma = 90$ |
| Exposure time<br>(min)                           |                                |                                | 5                              |                                |                                |
| Oscillation angle<br>(°)                         |                                |                                | 1                              |                                |                                |
| Detector distance<br>(mm)                        |                                |                                | 200                            |                                |                                |
| Wavelength (Å)                                   |                                |                                | 1.54178                        |                                |                                |

Values in parentheses are for the highest resolution shell.

| Diffraction data statistics of lysozyme crystals |              |              |              |              |              |
|--------------------------------------------------|--------------|--------------|--------------|--------------|--------------|
|                                                  | Crystal 21   | Crystal 22   | Crystal 23   | Crystal 24   | Crystal 25   |
| Resolution range                                 | 50-2.23      | 50-2.23      | 50-2.23      | 50-2.23      | 50-2.24      |
| (Å)                                              | (2.27-2.23)  | (2.27-2.23)  | (2.27-2.23)  | (2.27-2.23)  | (2.28-2.24)  |
| Mosaicity (°)                                    | 0.34         | 0.42         | 1.36         | 1.41         | 0.40         |
| $\langle I \rangle / \langle \sigma(I) \rangle$  | 11.92 (2.57) | 14.57 (2.10) | 16.33 (2.27) | 11.85 (2.16) | 12.37 (2.33) |
| Space group                                      | $P4_32_12$   | $P4_32_12$   | $P4_32_12$   | $P4_32_12$   | $P4_32_12$   |

|                             |                                |                                |                                |                                |                                |
|-----------------------------|--------------------------------|--------------------------------|--------------------------------|--------------------------------|--------------------------------|
| Cell dimension              | $a = 78.96$                    | $a = 78.95$                    | $a = 78.45$                    | $a = 78.79$                    | $a = 78.95$                    |
| $a, b, c$ (Å)               | $b = 78.96$                    | $b = 78.95$                    | $b = 78.45$                    | $b = 78.79$                    | $b = 78.95$                    |
|                             | $c = 38.15$                    | $c = 38.09$                    | $c = 37.79$                    | $c = 38.29$                    | $c = 37.90$                    |
| $\alpha, \beta, \gamma$ (°) | $\alpha = \beta = \gamma = 90$ |
| Exposure time<br>(min)      | 5                              |                                |                                |                                |                                |
| Oscillation angle<br>(°)    | 1                              |                                |                                |                                |                                |
| Detector distance<br>(mm)   | 200                            | 200                            | 200                            | 190                            | 200                            |
| Wavelength (Å)              | 1.54178                        |                                |                                |                                |                                |

Values in parentheses are for the highest resolution shell.

|                                                 | Diffraction data statistics of lysozyme crystals |                                |                                |                                |                                |
|-------------------------------------------------|--------------------------------------------------|--------------------------------|--------------------------------|--------------------------------|--------------------------------|
|                                                 | Crystal 26                                       | Crystal 27                     | Crystal 28                     | Crystal 29                     | Crystal 30                     |
| Resolution range                                | 50-2.24                                          | 50-2.27                        | 50-2.37                        | 50-2.38                        | 50-2.40                        |
| (Å)                                             | (2.28-2.24)                                      | (2.31-2.27)                    | (2.41-2.37)                    | (2.42-2.38)                    | (2.44-2.40)                    |
| Mosaicity (°)                                   | 0.47                                             | 0.39                           | 0.30                           | 0.34                           | 0.27                           |
| $\langle I \rangle / \langle \sigma(I) \rangle$ | 12.26 (2.02)                                     | 13.52 (2.12)                   | 8.62 (2.18)                    | 8.96 (2.01)                    | 10.11 (2.63)                   |
| Space group                                     | $P4_32_12$                                       | $P4_32_12$                     | $P4_32_12$                     | $P4_32_12$                     | $P4_32_12$                     |
| Cell dimension                                  | $a = 76.38$                                      | $a = 80.99$                    | $a = 78.34$                    | $a = 79.10$                    | $a = 78.91$                    |
| $a, b, c$ (Å)                                   | $b = 76.38$                                      | $b = 80.99$                    | $b = 78.34$                    | $b = 79.10$                    | $b = 78.91$                    |
|                                                 | $c = 36.08$                                      | $c = 39.13$                    | $c = 76.52$                    | $c = 38.00$                    | $c = 38.03$                    |
| $\alpha, \beta, \gamma$ (°)                     | $\alpha = \beta = \gamma = 90$                   | $\alpha = \beta = \gamma = 90$ | $\alpha = \beta = \gamma = 90$ | $\alpha = \beta = \gamma = 90$ | $\alpha = \beta = \gamma = 90$ |
| Exposure time<br>(min)                          | 5                                                |                                |                                |                                |                                |
| Oscillation angle<br>(°)                        | 1                                                |                                |                                |                                |                                |
| Detector distance                               | 185                                              | 200                            | 200                            | 200                            | 200                            |



|                |         |
|----------------|---------|
| (mm)           |         |
| Wavelength (Å) | 1.54178 |

Values in parentheses are for the highest resolution shell.

|                                                 | Diffraction data statistics of lysozyme crystals |                                |                                |                                |                                |
|-------------------------------------------------|--------------------------------------------------|--------------------------------|--------------------------------|--------------------------------|--------------------------------|
|                                                 | Crystal 31                                       | Crystal 32                     | Crystal 33                     | Crystal 34                     | Crystal 35                     |
| Resolution range                                | 50-2.41                                          | 50-2.41                        | 50-2.42                        | 50-2.42                        | 50-2.47                        |
| (Å)                                             | (2.45-2.41)                                      | (2.45-2.41)                    | (2.46-2.42)                    | (2.46-2.42)                    | (2.51-2.47)                    |
| Mosaicity (°)                                   | 1.02                                             | 1.22                           | 0.28                           | 0.88                           | 0.31                           |
| $\langle I \rangle / \langle \sigma(I) \rangle$ | 8.31 (2.03)                                      | 13.60 (2.90)                   | 8.08 (2.31)                    | 12.78 (3.66)                   | 8.30 (2.03)                    |
| Space group                                     | $P4_32_12$                                       | $P4_32_12$                     | $P4_32_12$                     | $P4_32_12$                     | $P4_32_12$                     |
| Cell dimension                                  | $a = 78.68$                                      | $a = 77.82$                    | $a = 78.93$                    | $a = 78.27$                    | $a = 78.44$                    |
| $a, b, c$ (Å)                                   | $b = 78.68$                                      | $b = 77.82$                    | $b = 78.93$                    | $b = 78.27$                    | $b = 78.44$                    |
|                                                 | $c = 37.83$                                      | $c = 37.40$                    | $c = 75.99$                    | $c = 38.09$                    | $c = 37.82$                    |
| $\alpha, \beta, \gamma$ (°)                     | $\alpha = \beta = \gamma = 90$                   | $\alpha = \beta = \gamma = 90$ | $\alpha = \beta = \gamma = 90$ | $\alpha = \beta = \gamma = 90$ | $\alpha = \beta = \gamma = 90$ |
| Exposure time                                   |                                                  |                                | 5                              |                                |                                |
| (min)                                           |                                                  |                                |                                |                                |                                |
| Oscillation angle                               |                                                  |                                | 1                              |                                |                                |
| (°)                                             |                                                  |                                |                                |                                |                                |
| Detector distance                               | 200                                              | 200                            | 200                            | 190                            | 190                            |
| (mm)                                            |                                                  |                                |                                |                                |                                |
| Wavelength (Å)                                  |                                                  |                                | 1.54178                        |                                |                                |

Values in parentheses are for the highest resolution shell.

|                  | Diffraction data statistics of lysozyme crystals |             |             |             |             |
|------------------|--------------------------------------------------|-------------|-------------|-------------|-------------|
|                  | Crystal 36                                       | Crystal 37  | Crystal 38  | Crystal 39  | Crystal 40  |
| Resolution range | 50-2.48                                          | 50-2.49     | 50-2.50     | 50-2.59     | 50-2.63     |
| (Å)              | (2.52-2.48)                                      | (2.53-2.49) | (2.54-2.50) | (2.63-2.59) | (2.68-2.63) |
| Mosaicity (°)    | 1.1                                              | 0.24        | 0.28        | 0.31        | 0.74        |

|                                                 |                                |                                |                                |                                |                                |
|-------------------------------------------------|--------------------------------|--------------------------------|--------------------------------|--------------------------------|--------------------------------|
| $\langle I \rangle / \langle \sigma(I) \rangle$ | 16.35 (3.14)                   | 9.73 (2.03)                    | 10.10 (2.37)                   | 7.01 (2.25)                    | 7.84 (3.32)                    |
| Space group                                     | $P4_32_12$                     | $P4_32_12$                     | $P4_32_12$                     | $P4_32_12$                     | $P4_32_12$                     |
| Cell dimension                                  | $a = 78.36$                    | $a = 78.88$                    | $a = 79.02$                    | $a = 78.92$                    | $a = 78.33$                    |
| $a, b, c$ (Å)                                   | $b = 78.36$                    | $b = 78.88$                    | $b = 79.02$                    | $b = 78.92$                    | $b = 78.33$                    |
|                                                 | $c = 38.07$                    | $c = 38.04$                    | $c = 38.00$                    | $c = 37.86$                    | $c = 37.68$                    |
| $\alpha, \beta, \gamma$ (°)                     | $\alpha = \beta = \gamma = 90$ |
| Exposure time<br>(min)                          |                                |                                | 5                              |                                |                                |
| Oscillation angle<br>(°)                        |                                |                                | 1                              |                                |                                |
| Detector distance<br>(mm)                       | 200                            | 200                            | 200                            | 200                            | 190                            |
| Wavelength (Å)                                  |                                |                                | 1.54178                        |                                |                                |

Values in parentheses are for the highest resolution shell.

|                                                 | Diffraction data statistics of lysozyme crystals |                                |                                |                                |                                |
|-------------------------------------------------|--------------------------------------------------|--------------------------------|--------------------------------|--------------------------------|--------------------------------|
|                                                 | Crystal 41                                       | Crystal 42                     | Crystal 43                     | Crystal 44                     | Crystal 45                     |
| Resolution range<br>(Å)                         | 50-2.64<br>(2.69-2.64)                           | 50-2.64<br>(2.69-2.64)         | 50-2.66<br>(2.71-2.66)         | 50-2.69<br>(2.74-2.69)         | 50-2.70<br>(2.75-2.70)         |
| Mosaicity (°)                                   | 0.26                                             | 0.26                           | 0.18                           | 0.97                           | 0.23                           |
| $\langle I \rangle / \langle \sigma(I) \rangle$ | 8.23 (2.13)                                      | 7.87 (2.24)                    | 7.77 (2.52)                    | 10.58 (2.43)                   | 7.64 (2.22)                    |
| Space group                                     | $P4_32_12$                                       | $P4_32_12$                     | $P4_32_12$                     | $P4_32_12$                     | $P4_32_12$                     |
| Cell dimension                                  | $a = 79.01$                                      | $a = 78.98$                    | $a = 79.01$                    | $a = 77.50$                    | $a = 79.01$                    |
| $a, b, c$ (Å)                                   | $b = 79.01$                                      | $b = 78.98$                    | $b = 79.01$                    | $b = 77.50$                    | $b = 79.01$                    |
|                                                 | $c = 37.97$                                      | $c = 37.94$                    | $c = 38.08$                    | $c = 37.53$                    | $c = 37.96$                    |
| $\alpha, \beta, \gamma$ (°)                     | $\alpha = \beta = \gamma = 90$                   | $\alpha = \beta = \gamma = 90$ | $\alpha = \beta = \gamma = 90$ | $\alpha = \beta = \gamma = 90$ | $\alpha = \beta = \gamma = 90$ |
| Exposure time<br>(min)                          |                                                  |                                | 5                              |                                |                                |
| Oscillation angle                               |                                                  |                                | 1                              |                                |                                |

---

|                   |         |
|-------------------|---------|
| (°)               |         |
| Detector distance | 200     |
| (mm)              |         |
| Wavelength (Å)    | 1.54178 |

---

Values in parentheses are for the highest resolution shell.

---

| Diffraction data statistics of lysozyme crystals |                                          |                                          |                                          |                                          |                                          |
|--------------------------------------------------|------------------------------------------|------------------------------------------|------------------------------------------|------------------------------------------|------------------------------------------|
|                                                  | Crystal 46                               | Crystal 47                               | Crystal 48                               | Crystal 49                               | Crystal 50                               |
| Resolution range                                 | 50-2.71                                  | 50-2.71                                  | 50-2.72                                  | 50-2.78                                  | 50-2.78                                  |
| (Å)                                              | (2.76-2.71)                              | (2.76-2.71)                              | (2.77-2.72)                              | (2.83-2.78)                              | (2.83-2.78)                              |
| Mosaicity (°)                                    | 0.54                                     | 0.65                                     | 0.41                                     | 0.45                                     | 0.48                                     |
| $\langle I \rangle / \langle \sigma(I) \rangle$  | 9.13 (2.05)                              | 10.80 (2.69)                             | 7.08 (3.20)                              | 6.82 (2.03)                              | 6.02 (2.07)                              |
| Space group                                      | <i>P</i> 4 <sub>3</sub> 2 <sub>1</sub> 2 |
| Cell dimension                                   | <i>a</i> = 79.08                         | <i>a</i> = 78.42                         | <i>a</i> = 78.67                         | <i>a</i> = 78.95                         | <i>a</i> = 78.76                         |
| <i>a</i> , <i>b</i> , <i>c</i> (Å)               | <i>b</i> = 79.08                         | <i>b</i> = 78.42                         | <i>b</i> = 78.67                         | <i>b</i> = 78.95                         | <i>b</i> = 78.76                         |
|                                                  | <i>c</i> = 38.04                         | <i>c</i> = 37.83                         | <i>c</i> = 38.13                         | <i>c</i> = 38.17                         | <i>c</i> = 38.02                         |
| $\alpha$ , $\beta$ , $\gamma$ (°)                | $\alpha = \beta = \gamma = 90$           |
| Exposure time                                    |                                          |                                          | 5                                        |                                          |                                          |
| (min)                                            |                                          |                                          |                                          |                                          |                                          |
| Oscillation angle                                |                                          |                                          | 1                                        |                                          |                                          |
| (°)                                              |                                          |                                          |                                          |                                          |                                          |
| Detector distance                                | 200                                      | 200                                      | 190                                      | 200                                      | 200                                      |
| (mm)                                             |                                          |                                          |                                          |                                          |                                          |
| Wavelength (Å)                                   |                                          |                                          | 1.54178                                  |                                          |                                          |

---

Values in parentheses are for the highest resolution shell.

---

| Diffraction data statistics of lysozyme crystals |            |            |            |
|--------------------------------------------------|------------|------------|------------|
|                                                  | Crystal 51 | Crystal 52 | Crystal 53 |
| Resolution range                                 | 50-2.78    | 50-2.86    | 50-2.89    |

|                                                 |                                |                                |                                |
|-------------------------------------------------|--------------------------------|--------------------------------|--------------------------------|
| (Å)                                             | (2.83-2.78)                    | (2.91-2.86)                    | (2.94-2.89)                    |
| Mosaicity (°)                                   | 0.72                           | 0.31                           | 0.27                           |
| $\langle I \rangle / \langle \sigma(I) \rangle$ | 7.37 (2.82)                    | 7.41 (2.34)                    | 7.11 (2.13)                    |
| Space group                                     | $P4_32_12$                     | $P4_32_12$                     | $P4_32_12$                     |
| Cell dimension                                  | $a = 78.31$                    | $a = 78.50$                    | $a = 79.05$                    |
| $a, b, c$ (Å)                                   | $b = 78.31$                    | $b = 78.50$                    | $b = 79.05$                    |
|                                                 | $c = 37.87$                    | $c = 37.89$                    | $c = 37.97$                    |
| $\alpha, \beta, \gamma$ (°)                     | $\alpha = \beta = \gamma = 90$ | $\alpha = \beta = \gamma = 90$ | $\alpha = \beta = \gamma = 90$ |
| Exposure time<br>(min)                          |                                | 5                              |                                |
| Oscillation angle<br>(°)                        |                                | 1                              |                                |
| Detector distance<br>(mm)                       |                                | 200                            |                                |
| Wavelength (Å)                                  |                                | 1.54178                        |                                |

Values in parentheses are for the highest resolution shell.

**Table S10** X-ray diffraction data statistics of lysozyme crystals obtained under simulated 1g condition in the superconducting magnet with lysozyme concentration 60 mg/ml.

|                                                 | Crystal 1                                | Crystal 2                                | Crystal 3                                | Crystal 4                                | Crystal 5                                |
|-------------------------------------------------|------------------------------------------|------------------------------------------|------------------------------------------|------------------------------------------|------------------------------------------|
| Resolution range                                | 50-2.17                                  | 50-2.19                                  | 50-2.21                                  | 50-2.21                                  | 50-2.21                                  |
| (Å)                                             | (2.21-2.17)                              | (2.23-2.19)                              | (2.25-2.21)                              | (2.25-2.21)                              | (2.25-2.21)                              |
| Mosaicity (°)                                   | 0.65                                     | 1.41                                     | 0.38                                     | 0.39                                     | 0.61                                     |
| $\langle I \rangle / \langle \sigma(I) \rangle$ | 14.75 (4.34)                             | 10.70 (2.86)                             | 16.40 (2.91)                             | 12.52 (2.17)                             | 13.50 (3.80)                             |
| Space group                                     | <i>P</i> 4 <sub>3</sub> 2 <sub>1</sub> 2 |
| Cell dimension                                  | <i>a</i> = 78.65                         | <i>a</i> = 78.87                         | <i>a</i> = 78.82                         | <i>a</i> = 78.79                         | <i>a</i> = 78.54                         |
| <i>a</i> , <i>b</i> , <i>c</i> (Å)              | <i>b</i> = 78.65                         | <i>b</i> = 78.87                         | <i>b</i> = 78.82                         | <i>b</i> = 78.79                         | <i>b</i> = 78.54                         |
|                                                 | <i>c</i> = 38.29                         | <i>c</i> = 37.98                         | <i>c</i> = 38.12                         | <i>c</i> = 38.35                         | <i>c</i> = 38.15                         |
| $\alpha$ , $\beta$ , $\gamma$ (°)               | $\alpha = \beta = \gamma = 90$           |
| Exposure time<br>(min)                          |                                          |                                          | 5                                        |                                          |                                          |
| Oscillation angle<br>(°)                        |                                          |                                          | 1                                        |                                          |                                          |
| Detector distance<br>(mm)                       | 190                                      | 200                                      | 200                                      | 200                                      | 200                                      |
| Wavelength (Å)                                  |                                          |                                          | 1.54178                                  |                                          |                                          |

Values in parentheses are for the highest resolution shell.

| Diffraction data statistics of lysozyme crystals |                                          |                                          |                                          |                                          |                                          |
|--------------------------------------------------|------------------------------------------|------------------------------------------|------------------------------------------|------------------------------------------|------------------------------------------|
|                                                  | Crystal 6                                | Crystal 7                                | Crystal 8                                | Crystal 9                                | Crystal 10                               |
| Resolution range                                 | 50-2.22                                  | 50-2.22                                  | 50-2.22                                  | 50-2.23                                  | 50-2.23                                  |
| (Å)                                              | (2.26-2.22)                              | (2.26-2.22)                              | (2.26-2.22)                              | (2.27-2.23)                              | (2.27-2.23)                              |
| Mosaicity (°)                                    | 0.30                                     | 0.32                                     | 0.47                                     | 0.37                                     | 0.57                                     |
| $\langle I \rangle / \langle \sigma(I) \rangle$  | 12.33 (2.16)                             | 12.36 (2.16)                             | 15.71 (3.09)                             | 12.80 (2.11)                             | 14.11 (2.63)                             |
| Space group                                      | <i>P</i> 4 <sub>3</sub> 2 <sub>1</sub> 2 |
| Cell dimension                                   | <i>a</i> = 79.05                         | <i>a</i> = 78.77                         | <i>a</i> = 78.57                         | <i>a</i> = 78.76                         | <i>a</i> = 78.56                         |
| <i>a</i> , <i>b</i> , <i>c</i> (Å)               | <i>b</i> = 79.05                         | <i>b</i> = 78.77                         | <i>b</i> = 78.57                         | <i>b</i> = 78.76                         | <i>b</i> = 78.56                         |
|                                                  | <i>c</i> = 37.99                         | <i>c</i> = 38.31                         | <i>c</i> = 38.23                         | <i>c</i> = 38.27                         | <i>c</i> = 37.81                         |

|                             |                                |                                |                                |                                |                                |
|-----------------------------|--------------------------------|--------------------------------|--------------------------------|--------------------------------|--------------------------------|
| $\alpha, \beta, \gamma$ (°) | $\alpha = \beta = \gamma = 90$ |
| Exposure time<br>(min)      |                                |                                | 5                              |                                |                                |
| Oscillation angle<br>(°)    |                                |                                | 1                              |                                |                                |
| Detector distance<br>(mm)   |                                |                                | 200                            |                                |                                |
| Wavelength (Å)              |                                |                                | 1.54178                        |                                |                                |

Values in parentheses are for the highest resolution shell.

|                                                 | Diffraction data statistics of lysozyme crystals |                                           |                                           |                                           |                                           |
|-------------------------------------------------|--------------------------------------------------|-------------------------------------------|-------------------------------------------|-------------------------------------------|-------------------------------------------|
|                                                 | Crystal 11                                       | Crystal 12                                | Crystal 13                                | Crystal 14                                | Crystal 15                                |
| Resolution range<br>(Å)                         | 50-2.23<br>(2.27-2.23)                           | 50-2.24<br>(2.28-2.24)                    | 50-2.24<br>(2.28-2.24)                    | 50-2.24<br>(2.28-2.24)                    | 50-2.25<br>(2.29-2.25)                    |
| Mosaicity (°)                                   | 1.26                                             | 0.32                                      | 0.38                                      | 0.68                                      | 0.42                                      |
| $\langle I \rangle / \langle \sigma(I) \rangle$ | 18.10 (2.24)                                     | 15.24 (2.77)                              | 11.64 (2.32)                              | 12.05 (3.22)                              | 17.08 (5.34)                              |
| Space group                                     | $P4_32_12$                                       | $P4_32_12$                                | $P4_32_12$                                | $P4_32_12$                                | $P4_32_12$                                |
| Cell dimension<br>$a, b, c$ (Å)                 | $a = 78.27$<br>$b = 78.27$<br>$c = 37.79$        | $a = 78.58$<br>$b = 78.58$<br>$c = 38.12$ | $a = 78.91$<br>$b = 78.91$<br>$c = 37.95$ | $a = 78.85$<br>$b = 78.85$<br>$c = 38.15$ | $a = 78.72$<br>$b = 78.72$<br>$c = 38.09$ |
| $\alpha, \beta, \gamma$ (°)                     | $\alpha = \beta = \gamma = 90$                   | $\alpha = \beta = \gamma = 90$            | $\alpha = \beta = \gamma = 90$            | $\alpha = \beta = \gamma = 90$            | $\alpha = \beta = \gamma = 90$            |
| Exposure time<br>(min)                          |                                                  |                                           | 5                                         |                                           |                                           |
| Oscillation angle<br>(°)                        |                                                  |                                           | 1                                         |                                           |                                           |
| Detector distance<br>(mm)                       |                                                  |                                           | 200                                       |                                           |                                           |
| Wavelength (Å)                                  |                                                  |                                           | 1.54178                                   |                                           |                                           |

Values in parentheses are for the highest resolution shell.

| Diffraction data statistics of lysozyme crystals |                                |                                |                                |                                |                                |
|--------------------------------------------------|--------------------------------|--------------------------------|--------------------------------|--------------------------------|--------------------------------|
|                                                  | Crystal 16                     | Crystal 17                     | Crystal 18                     | Crystal 19                     | Crystal 20                     |
| Resolution range                                 | 50-2.26                        | 50-2.26                        | 50-2.27                        | 50-2.30                        | 50-2.41                        |
| (Å)                                              | (2.30-2.26)                    | (2.30-2.26)                    | (2.31-2.27)                    | (2.34-2.30)                    | (2.45-2.41)                    |
| Mosaicity (°)                                    | 0.42                           | 0.54                           | 0.39                           | 0.43                           | 0.28                           |
| $\langle I \rangle / \langle \sigma(I) \rangle$  | 16.53 (4.89)                   | 17.98 (4.93)                   | 11.22 (2.19)                   | 9.16 (5.26)                    | 9.85 (2.37)                    |
| Space group                                      | $P4_32_12$                     | $P4_32_12$                     | $P4_32_12$                     | $P4_32_12$                     | $P4_32_12$                     |
| Cell dimension                                   | $a = 78.34$                    | $a = 78.51$                    | $a = 78.82$                    | $a = 78.36$                    | $a = 78.99$                    |
| $a, b, c$ (Å)                                    | $b = 78.34$                    | $b = 78.51$                    | $b = 78.82$                    | $b = 78.36$                    | $b = 78.99$                    |
|                                                  | $c = 38.29$                    | $c = 38.40$                    | $c = 38.13$                    | $c = 37.91$                    | $c = 38.30$                    |
| $\alpha, \beta, \gamma$ (°)                      | $\alpha = \beta = \gamma = 90$ |
| Exposure time<br>(min)                           |                                |                                | 5                              |                                |                                |
| Oscillation angle<br>(°)                         |                                |                                | 1                              |                                |                                |
| Detector distance<br>(mm)                        |                                |                                | 200                            |                                |                                |
| Wavelength (Å)                                   |                                |                                | 1.54178                        |                                |                                |

Values in parentheses are for the highest resolution shell.

| Diffraction data statistics of lysozyme crystals |              |             |              |             |              |
|--------------------------------------------------|--------------|-------------|--------------|-------------|--------------|
|                                                  | Crystal 21   | Crystal 22  | Crystal 23   | Crystal 24  | Crystal 25   |
| Resolution range                                 | 50-2.41      | 50-2.42     | 50-2.42      | 50-2.42     | 50-2.49      |
| (Å)                                              | (2.45-2.41)  | (2.46-2.42) | (2.46-2.42)  | (2.46-2.42) | (2.53-2.49)  |
| Mosaicity (°)                                    | 0.74         | 0.21        | 0.26         | 1.2         | 0.29         |
| $\langle I \rangle / \langle \sigma(I) \rangle$  | 11.65 (2.33) | 9.54 (2.57) | 14.73 (2.18) | 9.31 (2.82) | 10.86 (2.21) |
| Space group                                      | $P4_32_12$   | $P4_32_12$  | $P4_32_12$   | $P4_32_12$  | $P4_32_12$   |
| Cell dimension                                   | $a = 78.49$  | $a = 78.86$ | $a = 79.00$  | $a = 78.41$ | $a = 78.93$  |

|                             |                                |                                |                                |                                |                                |
|-----------------------------|--------------------------------|--------------------------------|--------------------------------|--------------------------------|--------------------------------|
| $a, b, c$ (Å)               | $b = 78.49$                    | $b = 78.86$                    | $b = 79.00$                    | $b = 78.41$                    | $b = 78.93$                    |
|                             | $c = 38.12$                    | $c = 38.04$                    | $c = 38.09$                    | $c = 38.20$                    | $c = 38.10$                    |
| $\alpha, \beta, \gamma$ (°) | $\alpha = \beta = \gamma = 90$ |
| Exposure time<br>(min)      | 5                              |                                |                                |                                |                                |
| Oscillation angle<br>(°)    | 1                              |                                |                                |                                |                                |
| Detector distance<br>(mm)   | 200                            | 200                            | 190                            | 200                            | 200                            |
| Wavelength (Å)              | 1.54178                        |                                |                                |                                |                                |

Values in parentheses are for the highest resolution shell.

|                                                 | Diffraction data statistics of lysozyme crystals |                                           |                                           |                                           |                                           |
|-------------------------------------------------|--------------------------------------------------|-------------------------------------------|-------------------------------------------|-------------------------------------------|-------------------------------------------|
|                                                 | Crystal 26                                       | Crystal 27                                | Crystal 28                                | Crystal 29                                | Crystal 30                                |
| Resolution range<br>(Å)                         | 50-2.52<br>(2.56-2.52)                           | 50-2.61<br>(2.61-2.57)                    | 50-2.80<br>(2.85-2.80)                    | 50-2.84<br>(2.89-2.84)                    | 50-2.84<br>(2.89-2.84)                    |
| Mosaicity (°)                                   | 1.33                                             | 0.37                                      | 0.22                                      | 0.21                                      | 1.55                                      |
| $\langle I \rangle / \langle \sigma(I) \rangle$ | 8.98 (2.14)                                      | 11.84 (4.62)                              | 7.39 (2.28)                               | 8.86 (2.23)                               | 8.07 (2.55)                               |
| Space group                                     | $P4_32_12$                                       | $P4_32_12$                                | $P4_32_12$                                | $P4_32_12$                                | $P4_32_12$                                |
| Cell dimension<br>$a, b, c$ (Å)                 | $a = 78.57$<br>$b = 78.57$<br>$c = 38.10$        | $a = 78.68$<br>$b = 78.68$<br>$c = 38.27$ | $a = 78.80$<br>$b = 78.80$<br>$c = 37.94$ | $a = 78.63$<br>$b = 78.63$<br>$c = 38.06$ | $a = 78.52$<br>$b = 78.52$<br>$c = 37.68$ |
| $\alpha, \beta, \gamma$ (°)                     | $\alpha = \beta = \gamma = 90$                   | $\alpha = \beta = \gamma = 90$            | $\alpha = \beta = \gamma = 90$            | $\alpha = \beta = \gamma = 90$            | $\alpha = \beta = \gamma = 90$            |
| Exposure time<br>(min)                          | 5                                                |                                           |                                           |                                           |                                           |
| Oscillation angle<br>(°)                        | 1                                                |                                           |                                           |                                           |                                           |
| Detector distance<br>(mm)                       | 200                                              | 190                                       | 200                                       | 200                                       | 200                                       |



---

|                |         |
|----------------|---------|
| Wavelength (Å) | 1.54178 |
|----------------|---------|

---

Values in parentheses are for the highest resolution shell.

|                                                 | Diffraction data statistics of lysozyme crystals |                                |                                |
|-------------------------------------------------|--------------------------------------------------|--------------------------------|--------------------------------|
|                                                 | Crystal 31                                       | Crystal 32                     | Crystal 33                     |
| Resolution range                                | 50-2.94                                          | 50-3.02                        | 50-3.08                        |
| (Å)                                             | (2.99-2.94)                                      | (3.07-3.02)                    | (3.13-3.08)                    |
| Mosaicity (°)                                   | 0.11                                             | 0.40                           | 0.22                           |
| $\langle I \rangle / \langle \sigma(I) \rangle$ | 10.67 (2.10)                                     | 6.97 (2.61)                    | 5.47 (2.88)                    |
| Space group                                     | $P4_32_12$                                       | $P4_32_12$                     | $P4_32_12$                     |
| Cell dimension                                  | $a = 78.85$                                      | $a = 79.00$                    | $a = 78.81$                    |
| $a, b, c$ (Å)                                   | $b = 78.85$                                      | $b = 79.00$                    | $b = 78.81$                    |
|                                                 | $c = 37.79$                                      | $c = 38.10$                    | $c = 38.04$                    |
| $\alpha, \beta, \gamma$ (°)                     | $\alpha = \beta = \gamma = 90$                   | $\alpha = \beta = \gamma = 90$ | $\alpha = \beta = \gamma = 90$ |
| Exposure time                                   |                                                  | 5                              |                                |
| (min)                                           |                                                  |                                |                                |
| Oscillation angle                               |                                                  | 1                              |                                |
| (°)                                             |                                                  |                                |                                |
| Detector distance                               |                                                  | 200                            |                                |
| (mm)                                            |                                                  |                                |                                |
| Wavelength (Å)                                  |                                                  | 1.54178                        |                                |

---

Values in parentheses are for the highest resolution shell.

**Table S11** X-ray diffraction data statistics of lysozyme crystals obtained under simulated 2g condition in the superconducting magnet with lysozyme concentration 60 mg/ml.

---

Diffraction data statistics of lysozyme crystals

|                                                 | Crystal 1                      | Crystal 2                      | Crystal 3                      | Crystal 4                      | Crystal 5                      |
|-------------------------------------------------|--------------------------------|--------------------------------|--------------------------------|--------------------------------|--------------------------------|
| Resolution range                                | 50-2.21                        | 50-2.22                        | 50-2.22                        | 50-2.23                        | 50-2.24                        |
| (Å)                                             | (2.25-2.21)                    | (2.26-2.22)                    | (2.26-2.22)                    | (2.27-2.23)                    | (2.28-2.24)                    |
| Mosaicity (°)                                   | 1.12                           | 0.33                           | 1.14                           | 0.29                           | 0.34                           |
| $\langle I \rangle / \langle \sigma(I) \rangle$ | 15.40 (4.42)                   | 13.21 (3.53)                   | 17.78 (3.25)                   | 9.35 (2.14)                    | 12.77 (3.56)                   |
| Space group                                     | $P4_32_12$                     | $P4_32_12$                     | $P4_32_12$                     | $P4_32_12$                     | $P4_32_12$                     |
| Cell dimension                                  | $a = 78.74$                    | $a = 78.15$                    | $a = 78.85$                    | $a = 78.99$                    | $a = 78.58$                    |
| $a, b, c$ (Å)                                   | $b = 78.74$                    | $b = 78.15$                    | $b = 78.85$                    | $b = 78.99$                    | $b = 78.58$                    |
|                                                 | $c = 38.11$                    | $c = 37.78$                    | $c = 37.94$                    | $c = 38.01$                    | $c = 38.02$                    |
| $\alpha, \beta, \gamma$ (°)                     | $\alpha = \beta = \gamma = 90$ |
| Exposure time<br>(min)                          |                                |                                | 5                              |                                |                                |
| Oscillation angle<br>(°)                        |                                |                                | 1                              |                                |                                |
| Detector distance<br>(mm)                       | 190                            | 200                            | 200                            | 200                            | 200                            |
| Wavelength (Å)                                  |                                |                                | 1.54178                        |                                |                                |

Values in parentheses are for the highest resolution shell.

| Diffraction data statistics of lysozyme crystals |                                |                                |                                |                                |                                |
|--------------------------------------------------|--------------------------------|--------------------------------|--------------------------------|--------------------------------|--------------------------------|
|                                                  | Crystal 6                      | Crystal 7                      | Crystal 8                      | Crystal 9                      | Crystal 10                     |
| Resolution range                                 | 50-2.25                        | 50-2.25                        | 50-2.26                        | 50-2.26                        | 50-2.29                        |
| (Å)                                              | (2.29-2.25)                    | (2.29-2.25)                    | (2.30-2.26)                    | (2.30-2.26)                    | (2.33-2.29)                    |
| Mosaicity (°)                                    | 0.33                           | 0.53                           | 0.40                           | 0.44                           | 0.56                           |
| $\langle I \rangle / \langle \sigma(I) \rangle$  | 13.75 (3.54)                   | 13.84 (3.30)                   | 10.37 (2.86)                   | 10.941 (2.31)                  | 9.16 (2.68)                    |
| Space group                                      | $P4_32_12$                     | $P4_32_12$                     | $P4_32_12$                     | $P4_32_12$                     | $P4_32_12$                     |
| Cell dimension                                   | $a = 78.66$                    | $a = 79.16$                    | $a = 78.53$                    | $a = 78.22$                    | $a = 78.76$                    |
| $a, b, c$ (Å)                                    | $b = 78.66$                    | $b = 79.17$                    | $b = 78.53$                    | $b = 78.22$                    | $b = 78.76$                    |
|                                                  | $c = 38.20$                    | $c = 37.68$                    | $c = 38.08$                    | $c = 38.50$                    | $c = 38.05$                    |
| $\alpha, \beta, \gamma$ (°)                      | $\alpha = \beta = \gamma = 90$ |
| Exposure time                                    |                                |                                | 5                              |                                |                                |

|                   |         |
|-------------------|---------|
| (min)             |         |
| Oscillation angle | 1       |
| (°)               |         |
| Detector distance | 200     |
| (mm)              |         |
| Wavelength (Å)    | 1.54178 |

Values in parentheses are for the highest resolution shell.

| Diffraction data statistics of lysozyme crystals |                                |                                |                                |                                |                                |
|--------------------------------------------------|--------------------------------|--------------------------------|--------------------------------|--------------------------------|--------------------------------|
|                                                  | Crystal 11                     | Crystal 12                     | Crystal 13                     | Crystal 14                     | Crystal 15                     |
| Resolution range                                 | 50-2.37                        | 50-2.38                        | 50-2.39                        | 50-2.41                        | 50-2.41                        |
| (Å)                                              | (2.41-2.37)                    | (2.42-2.38)                    | (2.43-2.39)                    | (2.45-2.41)                    | (2.45-2.41)                    |
| Mosaicity (°)                                    | 1.37                           | 0.32                           | 1.16                           | 0.22                           | 0.29                           |
| $\langle I \rangle / \langle \sigma(I) \rangle$  | 18.21 (3.99)                   | 12.38 (2.03)                   | 13.65 (2.02)                   | 8.83 (2.18)                    | 9.80 (2.23)                    |
| Space group                                      | $P4_32_12$                     | $P4_32_12$                     | $P4_32_12$                     | $P4_32_12$                     | $P4_32_12$                     |
| Cell dimension                                   | $a = 78.99$                    | $a = 78.14$                    | $a = 78.52$                    | $a = 78.93$                    | $a = 79.00$                    |
| $a, b, c$ (Å)                                    | $b = 78.99$                    | $b = 78.14$                    | $b = 78.52$                    | $b = 78.93$                    | $b = 79.00$                    |
|                                                  | $c = 38.06$                    | $c = 38.13$                    | $c = 38.05$                    | $c = 38.18$                    | $c = 38.20$                    |
| $\alpha, \beta, \gamma$ (°)                      | $\alpha = \beta = \gamma = 90$ |
| Exposure time                                    |                                |                                | 5                              |                                |                                |
| (min)                                            |                                |                                |                                |                                |                                |
| Oscillation angle                                |                                |                                | 1                              |                                |                                |
| (°)                                              |                                |                                |                                |                                |                                |
| Detector distance                                |                                |                                | 200                            |                                |                                |
| (mm)                                             |                                |                                |                                |                                |                                |
| Wavelength (Å)                                   |                                |                                | 1.54178                        |                                |                                |

Values in parentheses are for the highest resolution shell.

| Diffraction data statistics of lysozyme crystals |            |            |            |            |            |
|--------------------------------------------------|------------|------------|------------|------------|------------|
|                                                  | Crystal 16 | Crystal 17 | Crystal 18 | Crystal 19 | Crystal 20 |
| Resolution range                                 | 50-2.41    | 50-2.42    | 50-2.42    | 50-2.44    | 50-2.44    |

|                                                 |                                |                                |                                |                                |                                |
|-------------------------------------------------|--------------------------------|--------------------------------|--------------------------------|--------------------------------|--------------------------------|
| (Å)                                             | (2.45-2.41)                    | (2.46-2.42)                    | (2.46-2.42)                    | (2.48-2.44)                    | (2.48-2.44)                    |
| Mosaicity (°)                                   | 0.40                           | 0.45                           | 1.15                           | 0.25                           | 1.04                           |
| $\langle I \rangle / \langle \sigma(I) \rangle$ | 9.37 (2.15)                    | 10.05 (2.95)                   | 11.67 (3.22)                   | 8.24 (2.17)                    | 9.56 (3.20)                    |
| Space group                                     | $P4_32_12$                     | $P4_32_12$                     | $P4_32_12$                     | $P4_32_12$                     | $P4_32_12$                     |
| Cell dimension                                  | $a = 79.03$                    | $a = 78.64$                    | $a = 78.88$                    | $a = 78.84$                    | $a = 78.59$                    |
| $a, b, c$ (Å)                                   | $b = 79.03$                    | $b = 78.64$                    | $b = 78.88$                    | $b = 78.84$                    | $b = 78.59$                    |
|                                                 | $c = 37.86$                    | $c = 37.70$                    | $c = 38.35$                    | $c = 38.11$                    | $c = 38.22$                    |
| $\alpha, \beta, \gamma$ (°)                     | $\alpha = \beta = \gamma = 90$ |
| Exposure time<br>(min)                          |                                |                                | 5                              |                                |                                |
| Oscillation angle<br>(°)                        |                                |                                | 1                              |                                |                                |
| Detector distance<br>(mm)                       |                                |                                | 200                            |                                |                                |
| Wavelength (Å)                                  |                                |                                | 1.54178                        |                                |                                |

Values in parentheses are for the highest resolution shell.

|                                                 | Diffraction data statistics of lysozyme crystals |                                |                                |                                |                                |
|-------------------------------------------------|--------------------------------------------------|--------------------------------|--------------------------------|--------------------------------|--------------------------------|
|                                                 | Crystal 21                                       | Crystal 22                     | Crystal 23                     | Crystal 24                     | Crystal 25                     |
| Resolution range                                | 50-2.53                                          | 50-2.56                        | 50-2.64                        | 50-2.70                        | 50-2.75                        |
| (Å)                                             | (2.57-2.53)                                      | (2.60-2.56)                    | (2.69-2.64)                    | (2.75-2.70)                    | (2.80-2.75)                    |
| Mosaicity (°)                                   | 0.87                                             | 0.61                           | 0.26                           | 0.99                           | 0.23                           |
| $\langle I \rangle / \langle \sigma(I) \rangle$ | 11.48 (2.35)                                     | 14.36 (6.21)                   | 7.06 (2.14)                    | 6.99 (2.28)                    | 6.55 (2.15)                    |
| Space group                                     | $P4_32_12$                                       | $P4_32_12$                     | $P4_32_12$                     | $P4_32_12$                     | $P4_32_12$                     |
| Cell dimension                                  | $a = 78.71$                                      | $a = 78.77$                    | $a = 78.95$                    | $a = 78.65$                    | $a = 78.90$                    |
| $a, b, c$ (Å)                                   | $b = 78.71$                                      | $b = 78.77$                    | $b = 78.95$                    | $b = 78.65$                    | $b = 78.90$                    |
|                                                 | $c = 38.27$                                      | $c = 37.90$                    | $c = 38.18$                    | $c = 38.12$                    | $c = 38.13$                    |
| $\alpha, \beta, \gamma$ (°)                     | $\alpha = \beta = \gamma = 90$                   | $\alpha = \beta = \gamma = 90$ | $\alpha = \beta = \gamma = 90$ | $\alpha = \beta = \gamma = 90$ | $\alpha = \beta = \gamma = 90$ |
| Exposure time<br>(min)                          |                                                  |                                | 5                              |                                |                                |
| Oscillation angle                               |                                                  |                                | 1                              |                                |                                |

|                   |         |
|-------------------|---------|
| (°)               |         |
| Detector distance | 200     |
| (mm)              |         |
| Wavelength (Å)    | 1.54178 |

Values in parentheses are for the highest resolution shell.

|                                                 | Diffraction data statistics of lysozyme crystals |                                |                                |                                |                                |
|-------------------------------------------------|--------------------------------------------------|--------------------------------|--------------------------------|--------------------------------|--------------------------------|
|                                                 | Crystal 26                                       | Crystal 27                     | Crystal 28                     | Crystal 29                     | Crystal 30                     |
| Resolution range                                | 50-2.78                                          | 50-2.82                        | 50-3.07                        | 50-3.12                        | 50-3.29                        |
| (Å)                                             | (2.83-2.78)                                      | (2.87-2.82)                    | (3.12-3.07)                    | (3.17-3.12)                    | (3.35-3.29)                    |
| Mosaicity (°)                                   | 1.45                                             | 0.69                           | 0.38                           | 0.81                           | 1.45                           |
| $\langle I \rangle / \langle \sigma(I) \rangle$ | 11.09 (3.30)                                     | 11.00 (3.44)                   | 7.15 (2.17)                    | 7.00 (2.55)                    | 10.38 (3.94)                   |
| Space group                                     | $P4_32_12$                                       | $P4_32_12$                     | $P4_32_12$                     | $P4_32_12$                     | $P4_32_12$                     |
| Cell dimension                                  | $a = 78.40$                                      | $a = 78.13$                    | $a = 78.75$                    | $a = 77.15$                    | $a = 78.30$                    |
| $a, b, c$ (Å)                                   | $b = 78.40$                                      | $b = 78.13$                    | $b = 78.75$                    | $b = 77.15$                    | $b = 78.30$                    |
|                                                 | $c = 38.00$                                      | $c = 37.59$                    | $c = 38.20$                    | $c = 37.19$                    | $c = 37.36$                    |
| $\alpha, \beta, \gamma$ (°)                     | $\alpha = \beta = \gamma = 90$                   | $\alpha = \beta = \gamma = 90$ | $\alpha = \beta = \gamma = 90$ | $\alpha = \beta = \gamma = 90$ | $\alpha = \beta = \gamma = 90$ |
| Exposure time                                   |                                                  |                                | 5                              |                                |                                |
| (min)                                           |                                                  |                                |                                |                                |                                |
| Oscillation angle                               |                                                  |                                | 1                              |                                |                                |
| (°)                                             |                                                  |                                |                                |                                |                                |
| Detector distance                               |                                                  |                                | 200                            |                                |                                |
| (mm)                                            |                                                  |                                |                                |                                |                                |
| Wavelength (Å)                                  |                                                  |                                | 1.54178                        |                                |                                |

Values in parentheses are for the highest resolution shell.

**Table S12** X-ray diffraction data statistics of lysozyme crystals obtained at the control group in normal gravity outside the superconducting magnet with lysozyme concentration 60 mg/ml.

|  | Diffraction data statistics of lysozyme crystals |           |           |           |           |
|--|--------------------------------------------------|-----------|-----------|-----------|-----------|
|  | Crystal 1                                        | Crystal 2 | Crystal 3 | Crystal 4 | Crystal 5 |

|                                                 |                                |                                |                                |                                |                                |
|-------------------------------------------------|--------------------------------|--------------------------------|--------------------------------|--------------------------------|--------------------------------|
| Resolution range                                | 50-2.15                        | 50-2.18                        | 50-2.19                        | 50-2.19                        | 50-2.20                        |
| (Å)                                             | (2.19-2.15)                    | (2.22-2.18)                    | (2.23-2.19)                    | (2.23-2.19)                    | (2.24-2.20)                    |
| Mosaicity (°)                                   | 1.97                           | 0.58                           | 0.40                           | 0.47                           | 0.53                           |
| $\langle I \rangle / \langle \sigma(I) \rangle$ | 14.21 (6.06)                   | 17.37 (2.18)                   | 12.05 (2.12)                   | 12.92 (2.36)                   | 12.64 (3.18)                   |
| Space group                                     | $P4_32_12$                     | $P4_32_12$                     | $P4_32_12$                     | $P4_32_12$                     | $P4_32_12$                     |
| Cell dimension                                  | $a = 78.66$                    | $a = 78.62$                    | $a = 78.30$                    | $a = 78.70$                    | $a = 78.69$                    |
| $a, b, c$ (Å)                                   | $b = 78.66$                    | $b = 78.62$                    | $b = 78.30$                    | $b = 78.70$                    | $b = 78.69$                    |
|                                                 | $c = 38.20$                    | $c = 37.76$                    | $c = 38.36$                    | $c = 38.09$                    | $c = 37.96$                    |
| $\alpha, \beta, \gamma$ (°)                     | $\alpha = \beta = \gamma = 90$ |
| Exposure time<br>(min)                          |                                |                                | 5                              |                                |                                |
| Oscillation angle<br>(°)                        |                                |                                | 1                              |                                |                                |
| Detector distance<br>(mm)                       | 190                            | 200                            | 190                            | 200                            | 200                            |
| Wavelength (Å)                                  |                                |                                | 1.54178                        |                                |                                |

Values in parentheses are for the highest resolution shell.

|                                                 | Diffraction data statistics of lysozyme crystals |                                |                                |                                |                                |
|-------------------------------------------------|--------------------------------------------------|--------------------------------|--------------------------------|--------------------------------|--------------------------------|
|                                                 | Crystal 6                                        | Crystal 7                      | Crystal 8                      | Crystal 9                      | Crystal 10                     |
| Resolution range                                | 50-2.20                                          | 50-2.21                        | 50-2.21                        | 50-2.22                        | 50-2.23                        |
| (Å)                                             | (2.24-2.20)                                      | (2.25-2.21)                    | (2.25-2.21)                    | (2.26-2.22)                    | (2.27-2.23)                    |
| Mosaicity (°)                                   | 1.33                                             | 0.39                           | 1.1                            | 1.02                           | 0.35                           |
| $\langle I \rangle / \langle \sigma(I) \rangle$ | 20.21 (2.51)                                     | 9.67 (2.01)                    | 12.94 (2.76)                   | 15.67 (6.22)                   | 12.07 (3.24)                   |
| Space group                                     | $P4_32_12$                                       | $P4_32_12$                     | $P4_32_12$                     | $P4_32_12$                     | $P4_32_12$                     |
| Cell dimension                                  | $a = 78.67$                                      | $a = 78.82$                    | $a = 78.78$                    | $a = 78.72$                    | $a = 78.45$                    |
| $a, b, c$ (Å)                                   | $b = 78.67$                                      | $b = 78.82$                    | $b = 78.78$                    | $b = 78.72$                    | $b = 78.45$                    |
|                                                 | $c = 37.95$                                      | $c = 37.90$                    | $c = 37.90$                    | $c = 37.70$                    | $c = 38.05$                    |
| $\alpha, \beta, \gamma$ (°)                     | $\alpha = \beta = \gamma = 90$                   | $\alpha = \beta = \gamma = 90$ | $\alpha = \beta = \gamma = 90$ | $\alpha = \beta = \gamma = 90$ | $\alpha = \beta = \gamma = 90$ |

|                           |         |
|---------------------------|---------|
| Exposure time<br>(min)    | 5       |
| Oscillation angle<br>(°)  | 1       |
| Detector distance<br>(mm) | 200     |
| Wavelength (Å)            | 1.54178 |

Values in parentheses are for the highest resolution shell.

|                                                 | Diffraction data statistics of lysozyme crystals |                                           |                                           |                                           |                                           |
|-------------------------------------------------|--------------------------------------------------|-------------------------------------------|-------------------------------------------|-------------------------------------------|-------------------------------------------|
|                                                 | Crystal 11                                       | Crystal 12                                | Crystal 13                                | Crystal 14                                | Crystal 15                                |
| Resolution range<br>(Å)                         | 50-2.24<br>(2.28-2.24)                           | 50-2.25<br>(2.29-2.25)                    | 50-2.26<br>(2.30-2.26)                    | 50-2.30<br>(2.34-2.30)                    | 50-2.32<br>(2.36-2.32)                    |
| Mosaicity (°)                                   | 1.38                                             | 0.38                                      | 0.87                                      | 0.31                                      | 0.43                                      |
| $\langle I \rangle / \langle \sigma(I) \rangle$ | 13.09 (2.79)                                     | 14.70 (3.33)                              | 16.54 (3.72)                              | 10.49 (2.44)                              | 8.72 (2.28)                               |
| Space group                                     | $P4_32_12$                                       | $P4_32_12$                                | $P4_32_12$                                | $P4_32_12$                                | $P4_32_12$                                |
| Cell dimension<br>$a, b, c$ (Å)                 | $a = 78.68$<br>$b = 78.68$<br>$c = 37.96$        | $a = 78.59$<br>$b = 78.59$<br>$c = 38.32$ | $a = 78.67$<br>$b = 78.67$<br>$c = 38.22$ | $a = 79.03$<br>$b = 79.03$<br>$c = 38.18$ | $a = 78.75$<br>$b = 78.75$<br>$c = 38.08$ |
| $\alpha, \beta, \gamma$ (°)                     | $\alpha = \beta = \gamma = 90$                   | $\alpha = \beta = \gamma = 90$            | $\alpha = \beta = \gamma = 90$            | $\alpha = \beta = \gamma = 90$            | $\alpha = \beta = \gamma = 90$            |
| Exposure time<br>(min)                          | 5                                                |                                           |                                           |                                           |                                           |
| Oscillation angle<br>(°)                        | 1                                                |                                           |                                           |                                           |                                           |
| Detector distance<br>(mm)                       | 200                                              | 200                                       | 200                                       | 200                                       | 190                                       |
| Wavelength (Å)                                  | 1.54178                                          |                                           |                                           |                                           |                                           |

Values in parentheses are for the highest resolution shell.

| Diffraction data statistics of lysozyme crystals |                                |                                |                                |                                |                                |
|--------------------------------------------------|--------------------------------|--------------------------------|--------------------------------|--------------------------------|--------------------------------|
|                                                  | Crystal 16                     | Crystal 17                     | Crystal 18                     | Crystal 19                     | Crystal 20                     |
| Resolution range                                 | 50-2.36                        | 50-2.37                        | 50-2.39                        | 50-2.43                        | 50-2.52                        |
| (Å)                                              | (2.40-2.36)                    | (2.41-2.37)                    | (2.43-2.39)                    | (2.47-2.43)                    | (2.56-2.52)                    |
| Mosaicity (°)                                    | 0.90                           | 0.32                           | 0.55                           | 0.47                           | 0.47                           |
| $\langle I \rangle / \langle \sigma(I) \rangle$  | 9.75 (2.49)                    | 9.34 (2.73)                    | 9.04 (2.68)                    | 9.38 (2.34)                    | 8.53 (2.03)                    |
| Space group                                      | $P4_32_12$                     | $P4_32_12$                     | $P4_32_12$                     | $P4_32_12$                     | $P4_32_12$                     |
| Cell dimension                                   | $a = 78.89$                    | $a = 79.03$                    | $a = 78.03$                    | $a = 78.79$                    | $a = 78.75$                    |
| $a, b, c$ (Å)                                    | $b = 78.89$                    | $b = 79.03$                    | $b = 78.03$                    | $b = 78.79$                    | $b = 78.75$                    |
|                                                  | $c = 37.72$                    | $c = 38.11$                    | $c = 37.95$                    | $c = 38.43$                    | $c = 38.37$                    |
| $\alpha, \beta, \gamma$ (°)                      | $\alpha = \beta = \gamma = 90$ |
| Exposure time<br>(min)                           |                                |                                | 5                              |                                |                                |
| Oscillation angle<br>(°)                         |                                |                                | 1                              |                                |                                |
| Detector distance<br>(mm)                        |                                |                                | 200                            |                                |                                |
| Wavelength (Å)                                   |                                |                                | 1.54178                        |                                |                                |

Values in parentheses are for the highest resolution shell.

| Diffraction data statistics of lysozyme crystals |             |             |              |             |             |
|--------------------------------------------------|-------------|-------------|--------------|-------------|-------------|
|                                                  | Crystal 21  | Crystal 22  | Crystal 23   | Crystal 24  | Crystal 25  |
| Resolution range                                 | 50-2.68     | 50-2.69     | 50-2.72      | 50-2.79     | 50-2.85     |
| (Å)                                              | (2.73-2.68) | (2.74-2.69) | (2.77-2.72)  | (2.84-2.79) | (2.90-2.85) |
| Mosaicity (°)                                    | 0.29        | 5.41        | 1.22         | 0.41        | 4.67        |
| $\langle I \rangle / \langle \sigma(I) \rangle$  | 7.69 (2.61) | 8.08 (5.01) | 11.83 (2.22) | 7.76 (2.06) | 9.53 (5.26) |
| Space group                                      | $P4_32_12$  | $P4_32_12$  | $P4_32_12$   | $P4_32_12$  | $P4_32_12$  |
| Cell dimension                                   | $a = 78.18$ | $a = 78.82$ | $a = 78.59$  | $a = 78.67$ | $a = 78.53$ |
| $a, b, c$ (Å)                                    | $b = 78.18$ | $b = 78.82$ | $b = 78.59$  | $b = 78.67$ | $b = 78.53$ |



|                             |                                |                                |                                |                                |                                |
|-----------------------------|--------------------------------|--------------------------------|--------------------------------|--------------------------------|--------------------------------|
|                             | $c = 38.56$                    | $c = 37.81$                    | $c = 38.02$                    | $c = 38.34$                    | $c = 38.54$                    |
| $\alpha, \beta, \gamma$ (°) | $\alpha = \beta = \gamma = 90$ |
| Exposure time<br>(min)      |                                |                                | 5                              |                                |                                |
| Oscillation angle<br>(°)    |                                |                                | 1                              |                                |                                |
| Detector distance<br>(mm)   | 200                            | 200                            | 200                            | 200                            | 190                            |
| Wavelength (Å)              |                                |                                | 1.54178                        |                                |                                |

Values in parentheses are for the highest resolution shell.

| Diffraction data statistics of lysozyme crystals |                                           |                                           |                                           |                                           |                                           |
|--------------------------------------------------|-------------------------------------------|-------------------------------------------|-------------------------------------------|-------------------------------------------|-------------------------------------------|
|                                                  | Crystal 26                                | Crystal 27                                | Crystal 28                                | Crystal 29                                | Crystal 30                                |
| Resolution range<br>(Å)                          | 50-2.87<br>(2.92-2.87)                    | 50-2.90<br>(2.95-2.90)                    | 50-2.94<br>(2.99-2.94)                    | 50-2.95<br>(3.00-2.95)                    | 50-3.06<br>(3.11-3.06)                    |
| Mosaicity (°)                                    | 0.22                                      | 0.81                                      | 0.29                                      | 0.32                                      | 0.19                                      |
| $\langle I \rangle / \langle \sigma(I) \rangle$  | 7.40 (2.28)                               | 9.04 (7.50)                               | 6.06 (2.29)                               | 7.75 (2.49)                               | 5.59 (2.25)                               |
| Space group                                      | $P4_32_12$                                | $P4_32_12$                                | $P4_32_12$                                | $P4_32_12$                                | $P4_32_12$                                |
| Cell dimension<br>$a, b, c$ (Å)                  | $a = 78.83$<br>$b = 78.83$<br>$c = 38.07$ | $a = 79.13$<br>$b = 79.13$<br>$c = 37.96$ | $a = 79.09$<br>$b = 79.09$<br>$c = 38.05$ | $a = 78.92$<br>$b = 78.92$<br>$c = 38.02$ | $a = 78.85$<br>$b = 78.85$<br>$c = 38.07$ |
| $\alpha, \beta, \gamma$ (°)                      | $\alpha = \beta = \gamma = 90$            |
| Exposure time<br>(min)                           |                                           |                                           | 5                                         |                                           |                                           |
| Oscillation angle<br>(°)                         |                                           |                                           | 1                                         |                                           |                                           |
| Detector distance<br>(mm)                        |                                           |                                           | 200                                       |                                           |                                           |
| Wavelength (Å)                                   |                                           |                                           | 1.54178                                   |                                           |                                           |

Values in parentheses are for the highest resolution shell.

| Diffraction data statistics of lysozyme crystals |                                |
|--------------------------------------------------|--------------------------------|
| Crystal 31                                       |                                |
| Resolution range                                 | 50-3.17                        |
| (Å)                                              | (3.22-3.17)                    |
| Mosaicity (°)                                    | 0.86                           |
| $\langle I \rangle / \langle \sigma(I) \rangle$  | 6.17 (2.26)                    |
| Space group                                      | $P4_32_12$                     |
| Cell dimension                                   | $a = 78.68$                    |
| $a, b, c$ (Å)                                    | $b = 78.68$                    |
|                                                  | $c = 37.80$                    |
| $\alpha, \beta, \gamma$ (°)                      | $\alpha = \beta = \gamma = 90$ |
| Exposure time                                    | 5                              |
| (min)                                            |                                |
| Oscillation angle                                | 1                              |
| (°)                                              |                                |
| Detector distance                                | 200                            |
| (mm)                                             |                                |
| Wavelength (Å)                                   | 1.54178                        |

Values in parentheses are for the highest resolution shell.
